# Supplementary material for: A Summer of Cyanobacterial Blooms in Belgian Waterbodies: Microcystin Quantification and Molecular Characterizations
Source: MDPI journal article supplement (doi:10.3390/toxins14010061), 2022-01-16
Supplement: s1 [file s1]

Supplementary

# A Summer of Cyanobacterial Blooms in Belgian Waterbodies: Microcystin Quantification and Molecular Characterizations

Wannes Hugo R. Van Hassel <sup>1,2,\*</sup>, Mirjana Andjelkovic <sup>3</sup>, Benoit Durieu <sup>2</sup>, Viviana Almanza Marroquin <sup>4</sup>, Julien Masquelier <sup>1</sup>, Bart Huybrechts <sup>1,†</sup> and Annick Wilmotte <sup>2</sup>

<sup>1</sup> Toxins unit, Organic Contaminants and Additives, Sciensano, Rue Juliette Wytsmanstraat 14, 1050 Brussels, Belgium; Julien.Masquelier@sciensano.be (J.M); Bart.Huybrechts@sciensano.be (B.H.)

<sup>2</sup> InBios-Centre for Protein Engineering, Department of Life Sciences, University of Liège, Allée du six Août 11, 4000 Liège, Belgium; benoit.durieu@uliege.be (B.D.); awilmotte@uliege.be (A.W.)

<sup>3</sup> Risk and-Health Impact Assessment, Sciensano, Rue Juliette Wytsmanstraat 14, 1050 Brussels, Belgium; Mirjana.Andjelkovic@sciensano.be

<sup>4</sup> Phytoplankton and Phytobenthos laboratory, EULA Center, University of Concepcion, Barrio Universitario box 160, 3349001 Concepcion, Chile; valmanza@udec.cl

\* Correspondence: Wannes.Vanhassel@sciensano.be

† The author has passed away.

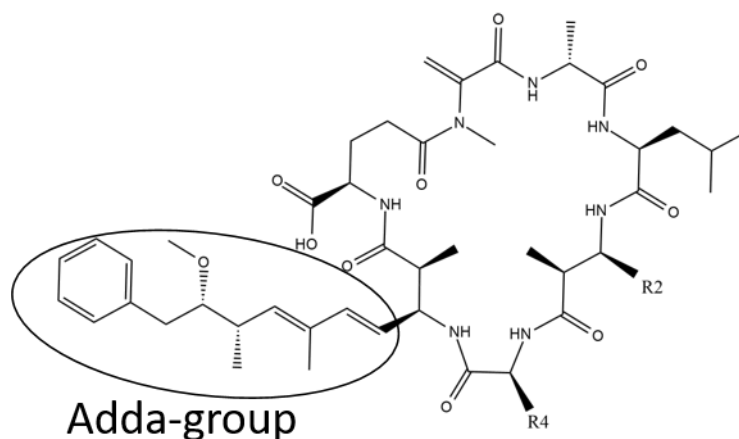

**Figure S1.** Microcystin core structure with annotated adda-group.



**Table S1.** Overview of experimental data for the water samples, concentrations of MC congeners and total microcystin ( $\mu\text{g L}^{-1}$ ), presence of genes coding for 16S rRNA and *mcyE*. molecular identification, coverage and identity % of the most similar hit by BLAST and primer used for Sanger sequencing. The first three characters of the samples annotation indicate the sample location, while the last two numbers indicate the week of the year when the sample was collected. Samples are grouped by origin, Flanders, Brussels and Wallonia. N.A. indicates samples for which no PCR was performed. “-” represent samples where no visible bands were obtained after gel electrophoresis of the PCR products or sequencing results were of too poor a quality to provide a reliable result. “?” represent inconclusive PCR results where the band was visible but was too faint or not at the correct height. The asterisk \* indicates that the sequence was obtained on the basis of a PCR reaction produced with the primer pair 359F-781R, whereas the others sequences were obtained with 359F-32S30R. “i” denotes the samples that were analyzed using Illumina technology.

| Samp<br>les  | MC-<br>RR<br>$\mu\text{g L}^{-1}$ | MC-<br>LA<br>$\mu\text{g L}^{-1}$ | MC-<br>LF<br>$\mu\text{g L}^{-1}$ | MC-<br>LR<br>$\mu\text{g L}^{-1}$ | MC-<br>LY<br>$\mu\text{g L}^{-1}$ | MC-<br>LW<br>$\mu\text{g L}^{-1}$ | MC-<br>YR<br>$\mu\text{g L}^{-1}$ | MC-<br>WR<br>$\mu\text{g L}^{-1}$ | Total<br>micro<br>cysti<br>n $\mu\text{g L}^{-1}$ | 16s<br>rRNA<br>As | Fresh biomass ( $10^6 \text{ g L}^{-1}$ ) | <i>mcyE</i> | Molecular<br>identification (genus) | cover<br>age<br>(%) | Per.<br>Ident<br>ity<br>(%) | prim<br>er |
|--------------|-----------------------------------|-----------------------------------|-----------------------------------|-----------------------------------|-----------------------------------|-----------------------------------|-----------------------------------|-----------------------------------|---------------------------------------------------|-------------------|-------------------------------------------|-------------|-------------------------------------|---------------------|-----------------------------|------------|
| AN1.<br>32   | 0.44                              | 0.00                              | 0.00                              | 0.23                              | 0.00                              | 0.00                              | 0.00                              | 0.00                              | 0.67                                              | +                 | 5.4                                       | +           | -                                   | -                   | -                           |            |
| AN2.<br>32   | 0.00                              | 0.00                              | 8.74                              | 121.7<br>7                        | 9.75                              | 2.22                              | 0.00                              | 0.00                              | 142.4<br>8                                        | +                 | 15.4                                      | +           | <i>Dolichospermum</i>               | 100                 | 100                         | 359F       |
| AN2.<br>37   | 12.77                             | 0.00                              | <LO<br>Q                          | 6.16                              | <LO<br>Q                          | 0.00                              | 1.41                              | 0.44                              | 20.78                                             | +                 | 5.6                                       | +           | <i>Synechococcus</i>                | 100                 | 99.16                       | 359F       |
| AN3.<br>37   | 0.00                              | 0.00                              | 16.64                             | 105.9<br>4                        | 12.75                             | 2.35                              | 0.00                              | 0.00                              | 137.6<br>8                                        | +                 | 3.7                                       | +           | <i>Romeria</i>                      | 99.71               | 98.65                       | 359F       |
| GH1.<br>30   | 0.00                              | 0.00                              | 0.00                              | 0.00                              | 0.00                              | 0.00                              | 0.00                              | 0.00                              | 0.00                                              | -                 | 4.9                                       | -           | -                                   | -                   | -                           |            |
| VL1.3<br>2   | 206.2<br>9                        | 3.73                              | 0.00                              | 75.43                             | 0.13                              | <LO<br>Q                          | 43.79                             | 24.04                             | 353.4<br>0                                        | +                 | 37.7                                      | +           | <i>Microcystis</i>                  | 100                 | 98.98                       | 781R*      |
| VL1.3<br>6   | 357.3<br>4                        | 30.31                             | 0.90                              | 196.1<br>5                        | 2.66                              | 3.44                              | 103.3<br>2                        | 52.56                             | 746.6<br>9                                        | +                 | 30.4                                      | +           | -                                   | -                   | -                           |            |
| VL2.3<br>4   | 1565.<br>98                       | 4.28                              | 0.52                              | 538.4<br>1                        | 1.16                              | 0.83                              | 241.3<br>2                        | 68.41                             | 2420.<br>91                                       | +                 | 13.2                                      | +           | <i>Dolichospermum</i>               | 100                 | 100                         | 359F       |
| VL2.3<br>6i  | 75.24                             | 0.39                              | <LO<br>Q                          | 30.00                             | 0.11                              | 0.00                              | 18.45                             | 4.74                              | 128.9<br>3                                        | +                 | 2.2                                       | +           | <i>Microcystis</i>                  | 100                 | 97.81                       | 781R*      |
| VL2.2<br>.36 | 1726.<br>08                       | 7.40                              | 3.02                              | 594.5<br>1                        | 3.49                              | 1.60                              | 277.0<br>0                        | 185.7<br>1                        | 2798.<br>81                                       | +                 | 102.8                                     | +           | <i>Microcystis</i>                  | 100                 | 99.68                       | 359F*      |
| VL3.3<br>4   | 0.16                              | 0.24                              | 0.00                              | <LO<br>Q                          | 0.00                              | 0.00                              | 0.00                              | 0.27                              | 0.67                                              | +                 | 3.6                                       | +           | <i>Dolichospermum</i>               | 100                 | 99.70                       | 359F       |
| BL1.2<br>9   | 66.89                             | 7.79                              | <LO<br>Q                          | 75.62                             | 0.00                              | 0.32                              | 97.30                             | 1.25                              | 249.1<br>8                                        | +                 | 4.3                                       | +           | <i>Microcystis</i>                  | 100                 | 100                         | 781R*      |
|              |                                   |                                   |                                   |                                   |                                   |                                   |                                   |                                   |                                                   |                   |                                           |             | <i>Synechococcus/Merismopedia</i>   | 100                 | 98.78                       | 359F       |



|                           |             |       |          |            |          |      |            |          |             |   |       |   |                       |       |       |            |
|---------------------------|-------------|-------|----------|------------|----------|------|------------|----------|-------------|---|-------|---|-----------------------|-------|-------|------------|
| <b>BL1.3</b><br><b>0</b>  | 143.5<br>4  | 13.45 | <LO<br>Q | 132.2<br>3 | 0.00     | 0.59 | 179.5<br>4 | 3.67     | 473.0<br>1  | + | 2.3   | + | <i>Microcystis</i>    | 100   | 99.13 | 781R*      |
| <b>BL1.3</b><br><b>5</b>  | 132.8<br>7  | 14.41 | 0.19     | 179.0<br>6 | <LO<br>Q | 0.56 | 275.9<br>1 | 2.84     | 605.8<br>5  | + | 2.9   | + | -                     | -     | -     | -          |
| <b>BL2.2</b><br><b>9</b>  | 0.00        | 0.00  | 0.00     | 0.68       | 0.00     | 0.00 | 0.00       | 0.00     | 0.68        | + | 3.8   | - | -                     | -     | -     | -          |
| <b>BL3.3</b><br><b>0</b>  | 0.00        | 0.00  | 0.00     | 0.00       | 0.00     | 0.00 | 0.00       | 0.00     | 0.00        | + | 10.22 | - | -                     | -     | -     | -          |
| <b>BL4.3</b><br><b>0</b>  | 0.00        | 0.00  | 0.00     | 0.00       | 0.00     | 0.00 | 0.00       | 0.00     | 0.00        | + | 3.5   | - | -                     | -     | -     | -          |
| <b>BL4.3</b><br><b>5</b>  | 0.11        | 0.00  | 0.00     | 0.00       | 0.00     | 0.00 | 0.00       | 0.00     | 0.11        | + | 1.5   | - | <i>Aphanizomenon</i>  | 100   | 100   | 359F       |
| <b>BL5.2</b><br><b>9i</b> | 0.81        | 0.00  | 0.00     | 0.41       | 0.00     | 0.00 | 0.00       | 0.00     | 1.22        | + | 0.6   | + | <i>Dolichospermum</i> | 100   | 100   | 359F       |
| <b>BL5.3</b><br><b>5</b>  | 0.89        | 0.00  | 0.00     | 0.44       | 0.00     | 0.00 | <LO<br>Q   | 0.00     | 1.33        | + | 12.2  | + | <i>Dolichospermum</i> | 100   | 100   | 359F       |
| <b>BL6.2</b><br><b>9</b>  | 0.00        | 0.00  | 0.00     | 0          | 0.00     | 0.00 | 0.00       | 0.00     | 0.00        | + | 17.8  | - | <i>Dolichospermum</i> | 100   | 100   | 359F       |
| <b>BL6.3</b><br><b>5</b>  | 0.00        | 0.00  | 0.00     | 0.00       | 0.00     | 0.00 | 0.00       | 0.00     | 0.00        | + | 3.7   | + | -                     | -     | -     | -          |
| <b>BL7.3</b><br><b>0</b>  | 0.00        | 0.00  | 0.00     | 0.00       | 0.00     | 0.00 | 0.00       | 0.00     | 0.00        | + | 5.5   | + | <i>Dolichospermum</i> | 99.82 | 99.26 | 359F       |
| <b>BL7.3</b><br><b>5</b>  | 0.00        | 0.00  | 0.00     | <LO<br>Q   | 0.00     | 0.00 | 0.00       | 0.00     | 0.00        | + | 2.2   | + | -                     | -     | -     | -          |
| <b>BL8.3</b><br><b>5</b>  | 0.51        | 0.00  | 0.00     | 0.39       | 0.00     | 0.00 | 0.16       | 0.00     | 1.07        | + | 2.5   | + | <i>Microcystis</i>    | 100   | 99.65 | 359F*      |
| <b>BV1.</b><br><b>34</b>  | 7.68        | 0.00  | 0.00     | 3.57       | 0.00     | 0.00 | 1.40       | <LO<br>Q | 12.65       | + | 1.4   | + | <i>Microcystis</i>    | 100   | 97.94 | 781R*      |
| <b>BV2.</b><br><b>34</b>  | 13.65       | 0.00  | 0.00     | 3.92       | 0.00     | 0.00 | 3.04       | 1.03     | 21.63       | + | 2.3   | + | <i>Microcystis</i>    | 100   | 99.82 | 23S30<br>R |
| <b>BV2.</b><br><b>35</b>  | 4.53        | 0.00  | 0.00     | 1.70       | <LO<br>Q | 0.00 | 0.80       | 0.31     | 7.34        | + | 1.9   | + | <i>Synechococcus</i>  | 99.81 | 96.85 | 359F       |
| <b>BV3.</b><br><b>35</b>  | 1213.<br>11 | 0.71  | 0.56     | 364.9<br>1 | 1.42     | 0.95 | 188.5<br>8 | 61.09    | 1831.<br>32 | + | 2.5   | - | <i>Phormidium</i>     | 100   | 98.02 | 359F       |
| <b>B04.2</b><br><b>7</b>  | 0.65        | 0.00  | 0.00     | 0.41       | 0.00     | 0.00 | 0.00       | 0.00     | 1.06        | + | 2.3   | + | <i>Aphanizomenon</i>  | 100   | 97.97 | 359F       |



|            |          |          |      |          |      |      |       |          |       |      |     |      |                |       |             |
|------------|----------|----------|------|----------|------|------|-------|----------|-------|------|-----|------|----------------|-------|-------------|
| B04.2<br>8 | 0.57     | 0.00     | 0.00 | 0.45     | 0.00 | 0.00 | 0.00  | 0.00     | 1.02  | +    | 2.7 | +    | -              | -     | -           |
| B04.2<br>9 | 0.25     | 0.00     | 0.00 | <LO<br>Q | 0.00 | 0.00 | 0.00  | 0.00     | 0.25  | +    | 3.0 | +    | Aphanizomenon  | 100   | 100 359F    |
|            |          |          |      |          |      |      |       |          |       |      |     |      | Planktothrix   | 100   | 98.42 781R* |
| B04.3<br>0 | <LO<br>Q | 0.00     | 0.00 | 0.00     | 0.00 | 0.00 | 0.00  | 0.00     | 0.00  | +    | 0.9 | N.A. | -              | -     | -           |
| B04.3<br>1 | 0.98     | 0.00     | 0.00 | 0.45     | 0.00 | 0.00 | 0.00  | 0.00     | 1.43  | +    | 1.2 | +    | Dolichospermum | 100   | 94.52 359F  |
| B04.3<br>2 | 0.72     | 0.00     | 0.00 | 0.49     | 0.00 | 0.00 | 0.00  | 0.00     | 1.21  | +    | 2.1 | +    | -              | -     | -           |
| B04.3<br>4 | 1.03     | 0.00     | 0.00 | 0.83     | 0.00 | 0.00 | 0.00  | 0.00     | 1.86  | +    | 1.8 | -    | Aphanizomenon  | 99.83 | 98.09 359F  |
| B04.3<br>5 | 0.38     | 0.00     | 0.00 | 0.32     | 0.00 | 0.00 | 0.00  | 0.00     | 0.70  | +    | 2.2 | ?    | -              | -     | -           |
| B04.3<br>6 | 0.19     | 0.00     | 0.00 | 0.22     | 0.00 | 0.00 | 0.00  | 0.00     | 0.41  | +    | 2.0 | +    | -              | -     | -           |
| B04.3<br>7 | 0.27     | 0.00     | 0.00 | 0.29     | 0.00 | 0.00 | 0.00  | 0.00     | 0.56  | +    | 2.1 | +    | -              | -     | -           |
| E04.2<br>7 | 0.12     | 0.00     | 0.00 | <LO<br>Q | 0.00 | 0.00 | 0.00  | 0.00     | 0.12  | N.A. | 6.1 | ?    | N.A.           | N.A.  | N.A.        |
| E04.2<br>8 | 0.36     | <LO<br>Q | 0.00 | 0.33     | 0.00 | 0.00 | 0.18  | 0.00     | 0.87  | +    | 1.7 | +    | -              | -     | -           |
| E04.2<br>9 | 0.29     | 0.00     | 0.00 | 0.49     | 0.00 | 0.00 | 0.47  | 0.00     | 1.26  | +    | 2.3 | +    | Aphanizomenon  | 99.85 | 99.85 359F  |
| E04.3<br>0 | 1.93     | 0.80     | 0.00 | 6.96     | 0.00 | 0.00 | 9.12  | 0.15     | 18.96 | +    | 1.6 | N.A. | -              | -     | -           |
| E04.3<br>1 | 1.57     | 0.40     | 0.00 | 3.25     | 0.00 | 0.00 | 8.85  | 0.00     | 14.07 | +    | 1.4 | N.A. | -              | -     | -           |
| E04.3<br>2 | 0.51     | <LO<br>Q | 0.00 | 0.94     | 0.00 | 0.00 | 2.60  | 0.00     | 4.05  | +    | 2.2 | +    | rhodoplast     | 98.9  | 95.48 781R  |
| E04.3<br>4 | 1.71     | 0.24     | 0.00 | 2.31     | 0.00 | 0.00 | 5.13  | 0.00     | 9.39  | +    | 2.3 | +    | Microcystis    | 99    | 97.00 359F* |
| E04.3<br>5 | 3.17     | 1.50     | 0.00 | 10.64    | 0.00 | 0.00 | 28.02 | <LO<br>Q | 43.34 | +    | 2.1 | ?    | -              | -     | -           |



|            |          |      |      |          |      |      |          |      |       |      |     |      |                      |       |       |            |
|------------|----------|------|------|----------|------|------|----------|------|-------|------|-----|------|----------------------|-------|-------|------------|
| E04.3<br>6 | 1.70     | 0.46 | 0.00 | 3.21     | 0.00 | 0.00 | 8.41     | 0.00 | 13.78 | +    | 2.1 | +    | <i>Microcystis</i>   | 100   | 94.00 | 359F       |
| E04.3<br>7 | 0.99     | 0.21 | 0.00 | 1.97     | 0.00 | 0.00 | 4.20     | 0.00 | 7.38  | N.A. | 2.4 | +    | N.A.                 | N.A.  | N.A.  |            |
| H02.2<br>7 | <LO<br>Q | 0.00 | 0.00 | 0.00     | 0.00 | 0.00 | 0.00     | 0.00 | 0.00  | +    | 3.1 | ?    | <i>Synechococcus</i> | 100   | 99.59 | 359F       |
| H02.2<br>8 | 0.60     | 0.00 | 0.00 | <LO<br>Q | 0.00 | 0.00 | 0.00     | 0.00 | 0.60  | +    | 2.2 | +    | -                    | -     | -     |            |
| H02.2<br>9 | 0.53     | 0.00 | 0.00 | 0.17     | 0.00 | 0.00 | 0.00     | 0.00 | 0.69  | +    | 1.1 | N.A. | -                    | -     | -     |            |
| H02.3<br>0 | 2.18     | 0.00 | 0.00 | 0.87     | 0.00 | 0.00 | <LO<br>Q | 0.00 | 3.05  | +    | 1.0 | N.A. | -                    | -     | -     |            |
| H02.3<br>1 | 3.16     | 0.00 | 0.00 | 0.71     | 0.00 | 0.00 | 0.18     | 0.00 | 4.05  | +    | 0.8 | +    | <i>Planktothrix</i>  | 99.44 | 94.99 | 359F       |
| H02.3<br>2 | 3.66     | 0.00 | 0.00 | 0.69     | 0.00 | 0.00 | <LO<br>Q | 0.00 | 4.35  | +    | 2.1 | +    | <i>Aphanizomenon</i> | 100   | 99.16 | 359F       |
| H02.3<br>4 | 3.32     | 0.00 | 0.00 | 0.69     | 0.00 | 0.00 | 0.18     | 0.00 | 4.18  | +    | 1.9 | +    | -                    | -     | -     |            |
| H02.3<br>5 | 2.37     | 0.00 | 0.00 | 0.43     | 0.00 | 0.00 | <LO<br>Q | 0.00 | 2.80  | +    | 1.9 | ?    | <i>Planktothrix</i>  | 100   | 100   | 359F       |
| H02.3<br>6 | 2.33     | 0.00 | 0.00 | 0.36     | 0.00 | 0.00 | <LO<br>Q | 0.00 | 2.69  | +    | 3.5 | ?    | <i>Synechococcus</i> | 99.80 | 99.45 | 23S30<br>R |
| H02.3<br>7 | 0.64     | 0.00 | 0.00 | 0.12     | 0.00 | 0.00 | <LO<br>Q | 0.00 | 0.76  | N.A. | 3.7 | -    | -                    | -     | -     |            |
| I01.27     | 0.00     | 0.00 | 0.00 | 0.00     | 0.00 | 0.00 | 0.00     | 0.00 | 0.00  | +    | 4.6 | +    | -                    | -     | -     |            |
| I01.28     | 0.13     | 0.00 | 0.00 | <LO<br>Q | 0.00 | 0.00 | 0.00     | 0.00 | 0.13  | +    | 2.7 | ?    | <i>Cyanobium</i>     | 100   | 98.10 | 781R       |
| I01.29     | 0.18     | 0.00 | 0.00 | 0.00     | 0.00 | 0.00 | 0.00     | 0.00 | 0.18  | +    | 1.3 | ?    | -                    | -     | -     |            |
| I01.30     | 0.46     | 0.00 | 0.00 | 0.00     | 0.00 | 0.00 | 0.00     | 0.00 | 0.46  | +    | 1.9 | N.A. | -                    | -     | -     |            |
| I01.31     | 1.26     | 0.00 | 0.00 | 0.24     | 0.00 | 0.00 | 0.15     | 0.00 | 1.66  | +    | 0.8 | N.A. | -                    | -     | -     |            |
| I01.32     | 0.19     | 0.00 | 0.00 | 0.00     | 0.00 | 0.00 | 0.00     | 0.00 | 0.19  | +    | 2.3 | N.A. | -                    | -     | -     |            |
| I01.34     | 0.44     | 0.00 | 0.00 | 0.12     | 0.00 | 0.00 | 0.00     | 0.00 | 0.56  | +    | 1.7 | +    | -                    | -     | -     |            |
| I01.35     | 0.15     | 0.00 | 0.00 | <LO<br>Q | 0.00 | 0.00 | 0.00     | 0.00 | 0.15  | +    | 1.8 | +    | <i>Synechococcus</i> | 100   | 99.81 | 359F       |
| I01.36     | 0.12     | 0.00 | 0.00 | 0.00     | 0.00 | 0.00 | 0.00     | 0.00 | 0.12  | +    | 2.1 | -    | -                    | -     | -     |            |



|        |            |          |          |          |          |      |          |          |            |   |     |   |                |       |       |       |
|--------|------------|----------|----------|----------|----------|------|----------|----------|------------|---|-----|---|----------------|-------|-------|-------|
| I01.37 | 0.44       | 0.00     | 0.00     | <LO<br>Q | 0.00     | 0.00 | 0.00     | 0.00     | 0.44       | + | 2.7 | + | Cyanobium      | 100   | 97.30 | 781R* |
| I04.27 | <LO<br>Q   | 0.00     | 0.00     | 0.04     | 0.00     | 0.00 | 0.00     | 0.00     | 0.04       | + | 1.9 | + | Aphanizomenon  | 100   | 99.64 | 359F  |
| I04.28 | 0.91       | 0.00     | 0.00     | 0.48     | 0.00     | 0.00 | <LO<br>Q | 0.00     | 1.39       | + | 1.5 | + | Aphanizomenon  | 99.84 | 98.85 | 359F  |
| I04.29 | 0.83       | 0.00     | 0.00     | 0.33     | <LO<br>Q | 0.00 | <LO<br>Q | 0.00     | 1.16       | + | 1.1 | + | Dolichospermum | 100   | 100   | 359F  |
| I04.30 | 6.11       | 0.00     | 0.00     | 2.90     | 0.42     | 0.00 | 0.36     | 0.00     | 9.79       | + | 3.3 | + | Dolichospermum | 99.83 | 99.16 | 359F  |
| I04.31 | 42.34      | 0.00     | 0.00     | 17.62    | 3.74     | 0.52 | 2.38     | <LO<br>Q | 66.61      | + | 2.5 | + | Dolichospermum | 100   | 99.39 | 359F  |
| I04.32 | 17.70      | 0.00     | <LO<br>Q | 6.92     | 1.34     | 0.27 | 1.73     | <LO<br>Q | 27.96      | + | 3.3 | + | Microcystis    | 100   | 99.66 | 359F* |
|        |            |          |          |          |          |      |          |          |            |   |     |   | Dolichospermum | 99.75 | 98.25 | 359F  |
| I04.34 | 51.87      | <LO<br>Q | 0.15     | 13.95    | 2.05     | 0.46 | 3.44     | 0.27     | 72.18      | + | 3.5 | + | Microcystis    | 100   | 98.65 | 359F  |
| I04.35 | 106.9<br>8 | 0.86     | 0.45     | 36.09    | 7.50     | 1.16 | 7.19     | 0.32     | 160.5<br>4 | + | 2.2 | + | -              | -     | -     |       |
| I04.36 | 167.4<br>0 | 1.15     | 0.77     | 56.88    | 11.22    | 1.76 | 10.59    | 0.58     | 250.3<br>5 | + | 2.9 | + | Planktothrix   | 99.11 | 95.63 | 359F  |
| I04.37 | 140.9<br>8 | 0.73     | 0.58     | 43.02    | 7.40     | 1.12 | 7.44     | 0.28     | 201.5<br>4 | + | 3.9 | + | Cyanodictyon   | 100   | 98.62 | 359F  |



**Table S2.** Overview of sampling sites in the different regions, water sample annotation, waterbody type and specific monitoring for cyanobacteria.

| Place<br>annotation | Name                                                        | Waterbody<br>type            | Monitored | Place<br>annotation | Name                                           | Waterbody<br>type | Monitored |
|---------------------|-------------------------------------------------------------|------------------------------|-----------|---------------------|------------------------------------------------|-------------------|-----------|
| <b>Wallonia</b>     |                                                             |                              |           | <b>Brussels</b>     |                                                |                   |           |
| <b>IO1</b>          | Lac de Falemprise,<br>Cerfontaine                           | Recreational<br>lake         | Yes       | BL1                 | Boudewijn park fase 1.<br>Jette                | Shallow<br>pond   | No        |
| <b>EO4</b>          | Grand large, Mons                                           | Recreational<br>lake         | Yes       | BL2                 | Boudewijn park fase 2.<br>Jette                | Shallow<br>pond   | No        |
| <b>BO4</b>          | Renipont-Plage, Lasne                                       | Recreational<br>lake         | Yes       | BL3                 | Big Mellaert pond. Sint-<br>Pieters-Wolluwe    | Shallow<br>pond   | No        |
| <b>HO2</b>          | Sport complex Saint-Leger,<br>Saint-Lèger                   | Recreational<br>lake         | Yes       | BL4                 | Tercoigne laan.<br>Watermaal-Bosvoorde         | Shallow<br>pond   | No        |
| <b>IO4</b>          | Lac de Bambois, Fosses-<br>La-Ville                         | Recreational<br>lake         | Yes       | BL5                 | Red cloister 3.Oudergem                        | Shallow<br>pond   | No        |
| <b>Flanders</b>     |                                                             |                              |           | BL6                 | Leybeekpond. Watermael-<br>Bosvoorde           | Shallow<br>pond   | No        |
| <b>GH1</b>          | Sedimentation pond<br>Gasthuisberg, Leuven                  | Sedimentation<br>pond        | No        | BL7                 | Rue de<br>pecheries.Watermaal-<br>Bosvoorde    | Shallow<br>pond   | No        |
| <b>AN1</b>          | Resort De kempen, Mol                                       | Recreational<br>shallow pond | Yes       | BL8                 | Little Mellaert pond. Sint-<br>Pieters-Wolluwe | Shallow<br>pond   | No        |
| <b>AN2</b>          | Hof van Eden, Westerloo                                     | Recreational<br>shallow pond | Yes       | BV1                 | Quai des Péniches. Sint-<br>Jan-Molenbeek      | Canal             | No        |
| <b>VL1</b>          | Kleine vijver provincial<br>domain Kessel-Lo, Kessel-<br>Lo | Shallow pond                 | No        | BV2                 | Quai de Heembeek Ferry<br>stop. Heembeek       | Canal             | No        |
| <b>VL2</b>          | Vossem pond Park,<br>Vossem                                 | Shallow pond                 | No        | BV3                 | Quai des Charbonnages.<br>Sint-Jan-Molenbeek   | Canal             | No        |
| <b>VL3</b>          | Gordaal pond, Tervuren                                      | Shallow pond                 | No        |                     |                                                |                   |           |
| <b>AN3</b>          | Zilverstrand, Mol                                           | Recreational<br>Lake         | Yes       |                     |                                                |                   |           |



**Table S3.** Detailed information for taxonomic identification based on BLAST analysis. \* Samples for which PCR with different primers gave different dominant taxa.

| Place                                                | Sample    | qseqid                 | Accession number | Title                                     | % identity | length | mismatch | gaps | e value   | bitscore |
|------------------------------------------------------|-----------|------------------------|------------------|-------------------------------------------|------------|--------|----------|------|-----------|----------|
| Hof van Eden, Westerloo                              | AN2.32    | GS20-C085-AWil-20-359F | MH669067         | <i>Dolichospermum circinale</i> NRERC-107 | 100        | 577    | 0        | 0    | 0         | 1066     |
|                                                      | AN2.37    | GS20-C088-AWil-26-359F | AM709627         | <i>Synechococcus</i> sp. PCC 7920         | 99.165     | 599    | 5        | 0    | 0         | 1079     |
| Zilverstrand, Mol                                    | AN3.37    | GS20-C089-AWil-27-359F | JQ819251         | <i>Romeria</i> sp. KLL-H-201              | 98.651     | 667    | 5        | 4    | 0         | 1179     |
| Kleine vijver provincial domain Kessel-Lo, Kessel-Lo | VL1.32    | GS20-C114-AWil-19-781R | LC557463         | <i>Microcystis aeruginosa</i> NIES-90     | 98.985     | 197    | 2        | 0    | 1.71E-93  | 353      |
| Vossem pond Park, Vossem                             | VL2.34    | GS20-C086-AWil-21-359F | FN691909         | <i>Dolichospermum flos-aquae</i> 04-57    | 100        | 427    | 0        | 0    | 0         | 789      |
|                                                      | VL2.36    | GS20-C116-AWil-24-781R | LC557463         | <i>Microcystis aeruginosa</i> NIES-90     | 97.81      | 274    | 4        | 2    | 6.57E-129 | 472      |
|                                                      | VL2.36bis | GS20-C064-AWil-25-359F | LC557463         | <i>Microcystis aeruginosa</i> NIES-90     | 99.681     | 313    | 1        | 0    | 2.04E-159 | 573      |
| Gordaal Vijver, Tervuren                             | VL3.34    | GS20-C087-AWil-22-359F | FN691909         | <i>Dolichospermum flos-aquae</i> 04-57    | 99.703     | 673    | 2        | 0    | 0         | 1232     |
| Boudewijn park fase 1, Jette                         | BL1.29*   | GS19-G066-AWil-1-781R  | LC557461         | <i>Microcystis aeruginosa</i> NIES-104    | 100        | 341    | 0        | 0    | 1.31E-176 | 630      |
|                                                      | BL1.29*   | GS20-C072-AWil-1-359F  | MT376739         | <i>Synechococcus</i> sp. SR-R4S2          | 98.785     | 494    | 6        | 0    | 0         | 880      |



|                                                   |         |                         |          |                                             |        |     |   |   |           |      |
|---------------------------------------------------|---------|-------------------------|----------|---------------------------------------------|--------|-----|---|---|-----------|------|
|                                                   |         | GS20-C072-AWil-1-359F   | EF088332 | <i>Merismopedia</i> sp.<br>CENA106          | 98.785 | 494 | 6 | 0 | 0         | 880  |
|                                                   | BL1.30  | GS19-G068-AWil-5-781R   | LC557461 | <i>Microcystis aeruginosa</i> NIES-104      | 99.13  | 345 | 0 | 3 | 1.03E-172 | 617  |
| <b>Tercoigne laan, Watermaal-Bosvoorde</b>        | BL4.35  | GS20-C080-AWil-11-359F  | MN104685 | <i>Aphanizomenon flos-aquae</i> NRERC-020   | 100    | 649 | 0 | 0 | 0         | 1199 |
| <b>Red cloister 3, Oudergem</b>                   | BL5.29  | GS20-C073-AWil-3-359F   | KC955174 | <i>Dolichospermum flos-aquae</i> CHAB 1657  | 100    | 509 | 0 | 0 | 0         | 941  |
|                                                   | BL5.35  | GS20-C081-AWil-12-359F  | MT558568 | <i>Dolichospermum planctonicum</i> ANCD0809 | 100    | 429 | 0 | 0 | 0         | 793  |
| <b>Leybeekpond, Watermael-Bosvoorde</b>           | BL6.29  | GS20-C074-AWil-4-359F   | MT558568 | <i>Dolichospermum planctonicum</i> ANCD0809 | 100    | 540 | 0 | 0 | 0         | 998  |
| <b>Rue de pecheries, Watermaal-Bosvoorde</b>      | BL7.30  | GS20-C077-AWil-7-359F   | LC096267 | <i>Dolichospermum flos-aquae</i> NIES-75    | 99.259 | 540 | 3 | 1 | 0         | 977  |
| <b>Little Mellaert pond, Sint-Pieters-Wolluwe</b> | BL8.35  | GS19-G073-AWil-15-359F  | LC557461 | <i>Microcystis aeruginosa</i> NIES-104      | 99.655 | 290 | 0 | 1 | 4.1E-146  | 529  |
| <b>Quai des Péniches, Sint-Jan-Molenbeek</b>      | BV1.34* | GS19-G072-AWil-8-781R   | LC557463 | <i>Microcystis aeruginosa</i> NIES-90       | 97.938 | 194 | 4 | 0 | 1.67E-88  | 337  |
|                                                   | BV1.34* | GS20-C131-AWil-8-23S30R | CP039373 | <i>Synechococcus</i> sp.<br>CB0101          | 95.161 | 62  | 1 | 1 | 2.74E-16  | 97.1 |
| <b>Quai de Heembeek Ferry stop, Heembeek</b>      | BV2.34  | GS20-C132-AWil-9-23S30R | AP019314 | <i>Microcystis viridis</i> NIES-102.        | 99.818 | 550 | 1 | 0 | 0         | 1011 |



|                                                  |         |                        |          |                                                       |        |     |    |   |           |      |
|--------------------------------------------------|---------|------------------------|----------|-------------------------------------------------------|--------|-----|----|---|-----------|------|
|                                                  | BV2.35  | GS20-C083-AWil-16-359F | MT376735 | <i>Synechococcus sp.</i><br>SR-C1                     | 96.846 | 539 | 16 | 1 | 0         | 900  |
| <b>Quai des Charbonnages, Sint-Jan Molenbeek</b> | BV3.35  | GS20-C084-AWil-17-359F | EU196622 | <i>Phormidium cf. tergestinum</i> Drak                | 98.023 | 354 | 7  | 0 | 3E-173    | 619  |
| <b>Renipont-Plage, Lasne</b>                     | B04.27  | GS20-C107-AWil-59-359F | MT443970 | <i>Aphanizomenon gracile</i> FBCC-A274                | 97.967 | 541 | 11 | 0 | 0         | 939  |
|                                                  | B04.29* | GS19-G118-AWil-69-781R | LC455659 | <i>Planktothrix agardhii</i> NIES-905                 | 98.423 | 317 | 5  | 0 | 5.78E-155 | 558  |
|                                                  | B04.29* | GS20-C111-AWil-69-359F | MT443970 | <i>Aphanizomenon gracile</i> FBCC-A274                | 100    | 442 | 0  | 0 | 0         | 817  |
|                                                  | B04.31  | GS20-C092-AWil-31-359F | MT443970 | <i>Aphanizomenon gracile</i> FBCC-A274                | 94.521 | 292 | 16 | 0 | 9.21E-123 | 451  |
|                                                  |         | GS20-C092-AWil-31-359F | CP051206 | <i>Dolichospermum flos-aquae</i> CCAP 1403/13F        | 94.521 | 292 | 16 | 0 | 9.21E-123 | 451  |
|                                                  | B04.34  | GS20-C104-AWil-53-359F | MT443970 | <i>Aphanizomenon gracile</i> FBCC-A274                | 98.087 | 575 | 10 | 1 | 0         | 1000 |
| <b>Grand large, Mons</b>                         | E04.29  | GS20-C112-AWil-71-359F | MN104685 | <i>Aphanizomenon flos-aquae</i> NRERC-020             | 99.846 | 650 | 0  | 1 | 0         | 1194 |
|                                                  | E04.32  | GS20-C121-AWil-46-781R | LT622877 | <i>Liagora brachyclada</i> chloroplast isolate J.0126 | 95.48  | 177 | 8  | 0 | 2E-72     | 283  |
|                                                  | E04.34  | GS19-G105-AWil-51-359F | LC557461 | <i>Microcystis aeruginosa</i> NIES-104                | 97.00  | 309 | 1  | 0 | 4E-145    | 518  |



|                                               |        |                        |          |                                         |        |     |    |   |           |      |
|-----------------------------------------------|--------|------------------------|----------|-----------------------------------------|--------|-----|----|---|-----------|------|
|                                               | E04.36 | GS20-C067-AWil-43-359F | LC557461 | <i>Microcystis aeruginosa</i> NIES-104  | 95.082 | 297 | 1  | 9 | 4E-120    | 435  |
| <b>Sport complex Saint-Leger, Saint-Lèger</b> | H02.27 | GS20-C106-AWil-58-359F | MT376735 | <i>Synechococcus</i> sp. SR-C1          | 99.591 | 489 | 2  | 0 | 0         | 893  |
|                                               | H02.31 | GS20-C093-AWil-32-359F | LC455659 | <i>Planktothrix agardhii</i> NIES-905   | 94.986 | 359 | 12 | 6 | 7.15E-155 | 558  |
|                                               | H02.32 | GS20-C102-AWil-49-359F | LC037454 | <i>Aphanizomenon</i> sp. NIES-3732      | 99.161 | 477 | 2  | 2 | 0         | 857  |
|                                               | H02.35 | GS20-C096-AWil-36-359F | LC455659 | <i>Planktothrix agardhii</i> NIES-905   | 100    | 498 | 0  | 0 | 0         | 920  |
|                                               | H02.36 | GS19-G115-AWil-67-359F | MT376735 | <i>Synechococcus</i> sp. SR-C1          | 99.66  | 296 | 1  | 0 | 5.39E-150 | 542  |
| <b>Lac de Falemprie, Cerfontaine</b>          | I01.28 | GS20-C124-AWil-65-781R | KM218863 | <i>Cyanobium</i> sp. UMPCCC 1208        | 98.099 | 263 | 5  | 0 | 4.88E-125 | 459  |
|                                               | I01.35 | GS20-C097-AWil-37-359F | MT376735 | <i>Synechococcus</i> sp. SR-C1          | 99.815 | 541 | 1  | 0 | 0         | 994  |
|                                               | I01.37 | GS19-G098-AWil-42-781R | AM710381 | <i>Cyanobium</i> sp. JJR2A5             | 97.297 | 296 | 8  | 0 | 2.55E-138 | 503  |
| <b>Lac de Bambois, Fosses-La-Ville</b>        | I04.27 | GS20-C105-AWil-57-359F | AJ293129 | <i>Aphanizomenon flos-aquae</i> PMC9706 | 99.638 | 552 | 2  | 0 | 0         | 1009 |
|                                               | I04.28 | GS20-C109-AWil-62-359F | EU078530 | <i>Aphanizomenon gracile</i> LMECYA 9   | 98.851 | 609 | 6  | 1 | 0         | 1085 |



|            |                        |          |                                          |        |     |   |   |           |      |
|------------|------------------------|----------|------------------------------------------|--------|-----|---|---|-----------|------|
| I04.29     | GS20-C113-AWil-72-359F | AP018316 | <i>Dolichospermum compactum</i> NIES-806 | 100    | 588 | 0 | 0 | 0         | 1086 |
| I04.30     | GS20-C090-AWil-29-359F | AP018316 | <i>Dolichospermum compactum</i> NIES-806 | 99.157 | 593 | 4 | 1 | 0         | 1066 |
| I04.31     | GS20-C091-AWil-30-359F | AP018316 | <i>Dolichospermum compactum</i> NIES-806 | 99.391 | 657 | 4 | 0 | 0         | 1192 |
| I04.32*    | GS19-G101-AWil-47-359F | LC557461 | <i>Microcystis aeruginosa</i> NIES-104   | 99.656 | 291 | 1 | 0 | 3.18E-147 | 532  |
| I04.32*    | GS20-C101-AWil-47-359F | GU197633 | <i>Dolichospermum circinale</i> CHAB233  | 98.25  | 400 | 6 | 1 | 0         | 699  |
| w19.I04.34 | GS20-C069-AWil-52-359F | LC557461 | <i>Microcystis aeruginosa</i> NIES-104   | 98.653 | 297 | 1 | 3 | 1.96E-144 | 523  |
| I04.36     | GS20-C100-AWil-45-359F | LC455659 | <i>Planktothrix agardhii</i> NIES-905    | 95.633 | 229 | 5 | 5 | 3.3E-96   | 363  |
| I04.37     | GS20-C098-AWil-39-359F | AM710382 | <i>Cyanodictyon</i> sp. JJCD             | 98.618 | 217 | 3 | 0 | 6.72E-103 | 385  |



**Table S4.** Number of reads and BLAST analysis of the representative sequence of the OTUs obtained with the Illumina amplicon sequencing.

| #OTU ID | BL5.29. Red<br>Cloister<br>Oudergem | VL1.36. Kessel-Lo<br>Provincial Domain | Accession<br>number of the<br>most similar<br>cultured hit | Name of the most<br>similar cultured hit                         | %<br>identit<br>y | length | mismatch | gaps | e value | bitscore |
|---------|-------------------------------------|----------------------------------------|------------------------------------------------------------|------------------------------------------------------------------|-------------------|--------|----------|------|---------|----------|
| OTU_72  | 5027                                | 12                                     | AY701560                                                   | <i>Anabaena ellipsoides</i><br>Ana HB                            | 100               | 362    | 0        | 0    | 0       | 669      |
| OTU_28  | 1517                                | 37200                                  | LC557463                                                   | <i>Microcystis aeruginosa</i><br>NIES-90                         | 100               | 362    | 0        | 0    | 0       | 669      |
| OTU_231 | 318                                 | 230                                    | HE975013                                                   | <i>Aphanizomenon flos-<br/>aquae</i> CCAP 1401/7                 | 100               | 362    | 0        | 0    | 0       | 669      |
| OTU_346 | 185                                 | 0                                      | AB610891                                                   | <i>Synechococcus</i> sp.<br>Suigetsu-CG2                         | 97.79             | 362    | 8        | 0    | 6E-175  | 625      |
| OTU_559 | 127                                 | 1                                      | EU078524                                                   | <i>Anabaena spiroides</i><br>LMECYA 161                          | 99.448            | 362    | 2        | 0    | 0       | 658      |
| OTU_582 | 76                                  | 1                                      | LC319779                                                   | <i>Dolichospermum</i> sp.<br>NIES-1951                           | 99.171            | 362    | 3        | 0    | 0       | 652      |
| OTU_678 | 61                                  | 0                                      | FN691909                                                   | <i>Dolichospermum flos-<br/>aquae</i> 04-57                      | 100               | 362    | 0        | 0    | 0       | 669      |
| OTU_537 | 50                                  | 41                                     | CP003495                                                   | <i>Cyanobium gracile</i> PCC<br>6307                             | 100               | 362    | 0        | 0    | 0       | 669      |
| OTU_649 | 25                                  | 0                                      | AM710380                                                   | <i>Cyanobium</i> sp. JJM10D5                                     | 99.724            | 362    | 1        | 0    | 0       | 664      |
| OTU_627 | 20                                  | 0                                      | GU936926                                                   | Chlorophyta symbiont<br>of <i>Lubomirskia</i> sp.<br>isolate R53 | 100               | 362    | 0        | 0    | 0       | 669      |
| OTU_4   | 0                                   | 7                                      | LT634149                                                   | <i>Timaviella circinata</i> GR4                                  | 99.448            | 362    | 2        | 0    | 0       | 658      |
| OTU_5   | 0                                   | 7                                      | MH688842                                                   | <i>Hormoscilla</i> cf.<br><i>pringsheimii</i> Us-s-6-2           | 98.619            | 362    | 5        | 0    | 6E-180  | 641      |
| OTU_6   | 0                                   | 7                                      | KM052844                                                   | <i>Leptolyngbya</i> sp. LCR-<br>CYANT35                          | 99.724            | 362    | 1        | 0    | 0       | 664      |



**Table S5.** Validation results for UHPLC-MS/MS method quantification method of 8 MCs and Nodularin in filtered cyanobacterial biomass. The different validation concentration levels Limit of detection (LOD) was set at lowest tested concentration where signal to noise ratio was higher than 3. Limit of Quantification (LOQ) was selected as lowest concentration for which the method was validated. Signal to noise ratio for LOQ should be above 20. Additionally, values for recovery, repeatability, reproducibility, measurement uncertainty (MU) and R<sup>2</sup> of the linear curve are presented.

| Toxins | Spiked Concentration     | Recovery (%) | Repeatability (%) | Reproducibility (%) | MU (%) | Average S/N<br>LOD (5.63 µg kg <sup>-1</sup> ) | Average S/N<br>LOQ ( 12.5 µg kg <sup>-1</sup> ) | R <sup>2</sup> |
|--------|--------------------------|--------------|-------------------|---------------------|--------|------------------------------------------------|-------------------------------------------------|----------------|
| MC-RR  | 12.5 µg kg <sup>-1</sup> | 88.00%       | 4.18%             | 21.94%              | 43.88% | 531.24                                         | 765.34                                          | 0.9994         |
|        | 50 µg kg <sup>-1</sup>   | 89.00%       | 10.54%            | 10.54%              | 21.07% |                                                |                                                 |                |
|        | 125 µg kg <sup>-1</sup>  | 92.00%       | 5.82%             | 15.65%              | 31.29% |                                                |                                                 |                |
|        | Average                  | 89.67%       | 6.85%             | 16.04%              | 32.08% |                                                |                                                 |                |
| MC-LA  | 12.5 µg kg <sup>-1</sup> | 100.00%      | 5.67%             | 14.40%              | 28.80% | 69.07                                          | 134.83                                          | 0.9992         |
|        | 50 µg kg <sup>-1</sup>   | 89.00%       | 5.46%             | 7.71%               | 15.41% |                                                |                                                 |                |
|        | 125 µg kg <sup>-1</sup>  | 101.00%      | 2.45%             | 6.81%               | 13.62% |                                                |                                                 |                |
|        | Average                  | 96.67%       | 4.53%             | 9.64%               | 19.28% |                                                |                                                 |                |
| MC-LF  | 12.5 µg kg <sup>-1</sup> | 95.00%       | 3.12%             | 18.51%              | 37.02% | 64.03                                          | 139.69                                          | 0.9992         |
|        | 50 µg kg <sup>-1</sup>   | 88.00%       | 5.85%             | 9.88%               | 19.76% |                                                |                                                 |                |
|        | 125 µg kg <sup>-1</sup>  | 101.00%      | 1.65%             | 3.67%               | 7.33%  |                                                |                                                 |                |
|        | Average                  | 94.67%       | 3.54%             | 10.68%              | 21.37% |                                                |                                                 |                |
| MC-LR  | 12.5 µg kg <sup>-1</sup> | 99.00%       | 4.71%             | 8.81%               | 17.62% | 116.82                                         | 265.64                                          | 0.9988         |
|        | 50 µg kg <sup>-1</sup>   | 92.00%       | 6.53%             | 7.04%               | 14.09% |                                                |                                                 |                |
|        | 125 µg kg <sup>-1</sup>  | 101.00%      | 1.45%             | 3.21%               | 6.43%  |                                                |                                                 |                |
|        | Average                  | 97.33%       | 4.23%             | 6.36%               | 12.71% |                                                |                                                 |                |
| MC-LY  | 12.5 µg kg <sup>-1</sup> | 96.00%       | 4.45%             | 13.11%              | 26.21% | 51.57                                          | 78.84                                           | 0.9992         |
|        | 50 µg kg <sup>-1</sup>   | 88.00%       | 3.12%             | 8.29%               | 16.57% |                                                |                                                 |                |
|        | 125 µg kg <sup>-1</sup>  | 100.00%      | 1.92%             | 4.76%               | 9.53%  |                                                |                                                 |                |
|        | Average                  | 94.67%       | 3.16%             | 8.72%               | 17.44% |                                                |                                                 |                |
| MC-LW  | 12.5 µg kg <sup>-1</sup> | 100.00%      | 6.63%             | 11.12%              | 22.23% | 42.89                                          | 92.86                                           | 0.9989         |
|        | 50 µg kg <sup>-1</sup>   | 90.00%       | 3.39%             | 11.93%              | 23.87% |                                                |                                                 |                |
|        | 125 µg kg <sup>-1</sup>  | 102.00%      | 2.21%             | 6.26%               | 12.51% |                                                |                                                 |                |
|        | Average                  | 97.33%       | 4.08%             | 9.77%               | 19.54% |                                                |                                                 |                |
| MC-YR  | 12.5 µg kg <sup>-1</sup> | 100.00%      | 6.38%             | 9.52%               | 19.05% | 75.26                                          | 139.15                                          | 0.9987         |
|        | 50 µg kg <sup>-1</sup>   | 94.00%       | 4.55%             | 4.55%               | 9.10%  |                                                |                                                 |                |



|       |                           |         |       |        |        |       |        |       |
|-------|---------------------------|---------|-------|--------|--------|-------|--------|-------|
|       | 125 µg kg <sup>-1</sup>   | 98.00%  | 3.09% | 3.58%  | 7.15%  |       |        |       |
|       | Average                   | 97.33%  | 4.67% | 5.88%  | 11.77% |       |        |       |
| MC-WR | 12.5 µg kg <sup>-1</sup>  | 96.00%  | 9.69% | 9.69%  | 19.38% |       |        |       |
|       | 50 µg kg <sup>-1</sup>    | 91.00%  | 9.57% | 12.86% | 25.73% |       |        |       |
|       | 125 µg kg <sup>-1</sup>   | 100.00% | 3.73% | 4.90%  | 9.81%  | 83.91 | 148.68 | 0.999 |
|       | Average                   | 95.67%  | 7.67% | 9.15%  | 18.31% |       |        |       |
|       |                           |         |       |        |        |       |        |       |
| SUM   | 112.5 µg kg <sup>-1</sup> | 96.00%  | 3.24% | 11.27% | 22.55% |       |        |       |
|       | 450 µg kg <sup>-1</sup>   | 91.00%  | 2.84% | 5.46%  | 10.91% |       |        |       |
|       | 1125 µg kg <sup>-1</sup>  | 99.00%  | 2.09% | 3.76%  | 7.52%  | N.A.  | N.A.   | N.A.  |
|       | Average                   | 95.33%  | 2.72% | 6.83%  | 13.66% |       |        |       |
|       |                           |         |       |        |        |       |        |       |

**Table S6.** Results of the ion ratio for the validation of the UHPLC-MS/MS method quantification method of 8 MCs and Nodularin in filtered cyanobacterial biomass. Acceptation criteria are based on European Decision 2002/EC/657.

| Toxin                        | MC-RR  | NOD    | MC-LA  | MC-LF  | MC-LR  | MC-LY  | MC-LW  | MC-YR  | MC-WR  |
|------------------------------|--------|--------|--------|--------|--------|--------|--------|--------|--------|
| Average ion ratio            | 13.37% | 46.65% | 51.91% | 41.51% | 31.66% | 45.82% | 49.20% | 33.21% | 40.21% |
| Standard Deviation ion ratio | 0.39%  | 2.08%  | 7.59%  | 2.43%  | 1.26%  | 3.68%  | 6.15%  | 3.19%  | 8.11%  |



**Table S7.** Detection results for 6 additional microcystin congeners with a limit of detection (LOD) at 0.1 µg L<sup>-1</sup>. Not detected is abbreviated by “n.d.”. Detected MCs are annotated as > LOD.

| <b>Samples</b> | <b>MC-HtyR</b> | <b>dm MC-LR/D-asg MC-LR</b> | <b>D-asg-Dhb MC-RR/dm MC-RR</b> | <b>MC-HilR</b> |
|----------------|----------------|-----------------------------|---------------------------------|----------------|
| AN1.32         | n.d.           | n.d.                        | > LOD                           | n.d.           |
| AN2.32         | n.d.           | > LOD                       | > LOD                           | > LOD          |
| AN2.37         | > LOD          | > LOD                       | > LOD                           | > LOD          |
| AN3.37         | n.d.           | > LOD                       | n.d.                            | > LOD          |
| GH1.30         | n.d.           | n.d.                        | n.d.                            | n.d.           |
| VL1.32         | n.d.           | > LOD                       | > LOD                           | > LOD          |
| VL1.36         | n.d.           | > LOD                       | > LOD                           | > LOD          |
| VL2.34         | n.d.           | > LOD                       | > LOD                           | > LOD          |
| VL2.36i        | n.d.           | > LOD                       | > LOD                           | > LOD          |
| VL2.2.36       | n.d.           | > LOD                       | > LOD                           | > LOD          |
| VL3.34         | n.d.           | n.d.                        | n.d.                            | n.d.           |
| BL1.29         | > LOD          | > LOD                       | > LOD                           | > LOD          |
| BL1.30         | > LOD          | > LOD                       | > LOD                           | > LOD          |
| BL1.35         | > LOD          | > LOD                       | > LOD                           | > LOD          |
| BL2.29         | n.d.           | > LOD                       | n.d.                            | n.d.           |
| BL3.30         | n.d.           | n.d.                        | n.d.                            | n.d.           |
| BL4.30         | n.d.           | n.d.                        | n.d.                            | n.d.           |
| BL4.35         | n.d.           | n.d.                        | n.d.                            | n.d.           |
| BL5.29i        | n.d.           | n.d.                        | n.d.                            | n.d.           |
| BL5.35         | n.d.           | n.d.                        | > LOD                           | n.d.           |
| BL6.29         | n.d.           | n.d.                        | n.d.                            | n.d.           |
| BL6.35         | n.d.           | n.d.                        | n.d.                            | n.d.           |
| BL7.30         | n.d.           | n.d.                        | n.d.                            | n.d.           |
| BL7.35         | n.d.           | n.d.                        | n.d.                            | n.d.           |
| BL8.35         | n.d.           | n.d.                        | > LOD                           | n.d.           |
| BV1.34         | n.d.           | > LOD                       | > LOD                           | > LOD          |
| BV2.34         | > LOD          | > LOD                       | > LOD                           | > LOD          |
| BV2.35         | > LOD          | > LOD                       | > LOD                           | > LOD          |
| BV3.35         | n.d.           | > LOD                       | > LOD                           | > LOD          |



|        |       |       |       |       |
|--------|-------|-------|-------|-------|
| B04.27 | n.d.  | n.d.  | > LOD | n.d.  |
| B04.28 | n.d.  | n.d.  | > LOD | n.d.  |
| B04.29 | n.d.  | n.d.  | > LOD | n.d.  |
| B04.30 | n.d.  | n.d.  | > LOD | n.d.  |
| B04.31 | n.d.  | n.d.  | > LOD | n.d.  |
| B04.32 | n.d.  | > LOD | > LOD | n.d.  |
| B04.34 | n.d.  | n.d.  | > LOD | n.d.  |
| B04.35 | n.d.  | n.d.  | > LOD | n.d.  |
| B04.36 | n.d.  | n.d.  | > LOD | n.d.  |
| B04.37 | n.d.  | n.d.  | > LOD | n.d.  |
| E04.27 | n.d.  | n.d.  | > LOD | n.d.  |
| E04.28 | n.d.  | > LOD | > LOD | n.d.  |
| E04.29 | n.d.  | > LOD | > LOD | n.d.  |
| E04.30 | > LOD | > LOD | > LOD | > LOD |
| E04.31 | n.d.  | > LOD | > LOD | > LOD |
| E04.32 | n.d.  | > LOD | > LOD | n.d.  |
| E04.34 | n.d.  | > LOD | > LOD | > LOD |
| E04.35 | > LOD | > LOD | > LOD | > LOD |
| E04.36 | > LOD | > LOD | > LOD | > LOD |
| E04.37 | n.d.  | > LOD | > LOD | > LOD |
| H02.27 | n.d.  | n.d.  | > LOD | n.d.  |
| H02.28 | n.d.  | n.d.  | > LOD | n.d.  |
| H02.29 | n.d.  | n.d.  | > LOD | n.d.  |
| H02.30 | n.d.  | > LOD | > LOD | n.d.  |
| H02.31 | > LOD | > LOD | > LOD | n.d.  |
| H02.32 | n.d.  | > LOD | > LOD | n.d.  |
| H02.34 | n.d.  | > LOD | > LOD | n.d.  |
| H02.35 | n.d.  | > LOD | > LOD | n.d.  |
| H02.36 | n.d.  | > LOD | > LOD | n.d.  |
| H02.37 | n.d.  | > LOD | > LOD | n.d.  |
| I01.27 | n.d.  | n.d.  | n.d.  | n.d.  |
| I01.28 | n.d.  | n.d.  | n.d.  | n.d.  |



|        |       |       |       |       |
|--------|-------|-------|-------|-------|
| I01.29 | n.d.  | n.d.  | n.d.  | n.d.  |
| I01.30 | n.d.  | n.d.  | n.d.  | n.d.  |
| I01.31 | n.d.  | n.d.  | > LOD | n.d.  |
| I01.32 | n.d.  | n.d.  | n.d.  | n.d.  |
| I01.34 | n.d.  | n.d.  | > LOD | n.d.  |
| I01.35 | n.d.  | n.d.  | > LOD | n.d.  |
| I01.36 | n.d.  | n.d.  | > LOD | n.d.  |
| I01.37 | n.d.  | n.d.  | > LOD | n.d.  |
| I04.27 | n.d.  | n.d.  | n.d.  | n.d.  |
| I04.28 | > LOD | > LOD | > LOD | n.d.  |
| I04.29 | n.d.  | > LOD | > LOD | n.d.  |
| I04.30 | n.d.  | > LOD | > LOD | n.d.  |
| I04.31 | n.d.  | > LOD | > LOD | > LOD |
| I04.32 | n.d.  | > LOD | > LOD | > LOD |
| I04.34 | n.d.  | > LOD | > LOD | > LOD |
| I04.35 | n.d.  | > LOD | > LOD | > LOD |
| I04.36 | n.d.  | > LOD | > LOD | > LOD |
| I04.37 | n.d.  | > LOD | > LOD | > LOD |



**Table S8.** Overview of the single sequences amplified by the Sanger method used for taxonomic identification based on BLAST analysis.

| Sample number<br>and primer number | Genus name            | Sanger sequence                                                                                                                                                                                                                                                                                                                                                                                                                                                                                                                                                                                                                                                                                                            |
|------------------------------------|-----------------------|----------------------------------------------------------------------------------------------------------------------------------------------------------------------------------------------------------------------------------------------------------------------------------------------------------------------------------------------------------------------------------------------------------------------------------------------------------------------------------------------------------------------------------------------------------------------------------------------------------------------------------------------------------------------------------------------------------------------------|
| AN2.32_359F                        | <i>Dolichospermum</i> | AGGCTCTTGGGTTGTAAACCTCTTTTCTCAGGGAAGAAAAAATGACGGTACCTGAGGAATAAGCATCGG<br>CTAACTCCGTGCCAGCAGCCGCGGTAATACGGAGGATGCAAGCGTTATCCGGAATGATTGGGCGTAAAG<br>GGTCCGCAGGTGGCATTGTAAGTCTGCTGTAAAGAGTCTAGCTCAACTAGATAAAAAGCAGTGGAACCTA<br>CAAAGCTAGAGTTTGGTCGGGGCAGAAGGAATTCCTGGTGTAGCGGTGAAATGCGTAGATATCAGGAAG<br>AACACCAGTGGCGAAGGCGTTCTGCTAGGCCGAGACTGACACTGAGGGACGAAAGCTAGGGGAGCGAAT<br>GGGATTAGATACCCAGTAGTCTAGCCGTAAACGATGGATACTAGGCGTAGCTCGTATCGACCCGAGCT<br>GTGCCGGAGCTAACGCGTTAAGTATCCCGCCTGGGGAGTACGCAGGCAACTGTGAAACTCAAAGGAATT<br>GACGGGGGCCCCGCACAAGCGGTGGAGTATGTGGTTTAATTTCGATGCAACGCGAAGAACCTTACCAAGGC<br>TTGACATGTCACGAATCCTGTG                                                                                           |
| AN2.37_359F                        | <i>Synechococcus</i>  | TTCCGTGCCAGCAGCCGCGTAATACGGGAGTGGCAAGCGTTATCCGGAATTATTGGGCGTAAAGCGTCC<br>GCAGGCGGCCTTGTAAGTCTGTCGTAAAGCGTGGAGCTCAACTCCATTTAAGCGATGGAAACTACAAGG<br>CTGGAGTGTGGTAGGGGCAGAGGGAATTCGCGGTGTAGCGGTGAAATGCGTAGATATCGGGAAGAACAC<br>CAGTGGCGAAGGCGCTCTGCTGGGCCATAACTGACGCTCATGGACGAAAGCCAGGGGAGCGAAAGGGAT<br>TAGATACCCCTGTAGTCTGCGCGTAAACGATGAACACTAGGTGTGCGGGGAATCGACCCCTCGGTGTC<br>GTAGCCAACGCGTTAAGTGTTCGCGCTGGGGAGTACGCACGCAAGTGTGAAACTCAAAGGAATTGACGG<br>GGGCCCCGCACAAGCGGTGGAGTATGTGGTTTAATTTCGATGCAACGCGAAGAACCTTACCAGGGCTTGACA<br>TGCTGCGAATCCCCTGGAAACGAGGGAGTGCCTTCGGGAGCGCAGAGACAGGTGGTGCATGGCTGTCGTC<br>AGCTCGTGTCTGTAGATGTTGGGTTAAGTCCCGCAACGAGCG                                                                      |
| AN3.37_359F                        | <i>Romeria</i>        | AGGAGGCCTTAGGGTTGTAAACCTCTTTTCTCTGGGAAGAAGAACTGACGGTACCAGAGGAATAAGCCTC<br>GGCTAACTCCGTGCCAGCAGCCGCGTAAGACGGAGGAGGCGAGCGTTATCCGGAATTATTGGGCGTAA<br>AGCGTCCGCAGGCGGTTTATCAAGTCTGCTGTCAAAGACTACAGCTTAACTGTGGGCAGGCAGTGGAAC<br>TGATGAACTAGAGAGCGGTAGGGGTAGAGGGAATTCGCGGTGTAGCGGTGAAATGCGTAGATATCGGGA<br>AGAACACCAGTGGCGAAGGCGCTCTACTGGGCCGTTACTGACGCTGAGGGACGAAAGCTAGGGGAGCGA<br>AAGGGATTAGATACCCCTGTAGTCTAGCTGTAAACGATGGATACTAGGTGTTGGGCGTATCGACCCGTC<br>CAGTACCGTAGCTAACGCGTTAAGTATCCCGCCTGGGGAGTACGCACGCAAGTGTGAAACTCAAAGGAA<br>TTGACGGGGGCCCCGCACAAGCGGTGGAGGATGTGGTTTAATTTCGATGCAACGCGAAGAACCTTACCAAG<br>GCTTGACATCCTGCGAATCCTTCAGAGATGAGGGAGTGCCTTCGGGAGCGCAGAGACAGGTGGTGCATGG<br>CTGTCGTCAGCTCGTGTCTGTAGATGTTGGGTTAAGTC |
| VL1.32_781R                        | <i>Microcystis</i>    | GCCACCGATGTTCTTCCCAATCTCTACGCATTTACCGCTACACTGGGAATTCCTGCTACCCCTACTGCTCT<br>CTAGTCTGCCAGTTTCCACCGCCTTTATGTCTGTTAAGCAACCTGATTTGACAGCAGACTTGGCTGACCACC<br>TGCGGACGCTTTACGCCCAATAATTCCGGATAACGCTTGCTTCCCCCGTATTACCGCGGCTGCTGGCACGG<br>AGTTAGCCGATGCTGATTCCTCAAGTACCGTCA                                                                                                                                                                                                                                                                                                                                                                                                                                                        |



|                 |                                    |                                                                                                                                                                                                                                                                                                                                                                                                                                                                                                                                                                                                                                                                                                                                                                                                                                                                                                                                                                                                                                                                                                                                                                                                                                                                                                                                                                                                                                                                                                                                                                                                                                                                                                                                                                                                                                                                                                                                                                                                                                                                                                                                                                                                                                                                                                                                                                                                                                                                                                                                                                                                                                                                                                 |
|-----------------|------------------------------------|-------------------------------------------------------------------------------------------------------------------------------------------------------------------------------------------------------------------------------------------------------------------------------------------------------------------------------------------------------------------------------------------------------------------------------------------------------------------------------------------------------------------------------------------------------------------------------------------------------------------------------------------------------------------------------------------------------------------------------------------------------------------------------------------------------------------------------------------------------------------------------------------------------------------------------------------------------------------------------------------------------------------------------------------------------------------------------------------------------------------------------------------------------------------------------------------------------------------------------------------------------------------------------------------------------------------------------------------------------------------------------------------------------------------------------------------------------------------------------------------------------------------------------------------------------------------------------------------------------------------------------------------------------------------------------------------------------------------------------------------------------------------------------------------------------------------------------------------------------------------------------------------------------------------------------------------------------------------------------------------------------------------------------------------------------------------------------------------------------------------------------------------------------------------------------------------------------------------------------------------------------------------------------------------------------------------------------------------------------------------------------------------------------------------------------------------------------------------------------------------------------------------------------------------------------------------------------------------------------------------------------------------------------------------------------------------------|
| VL2.34_359F     | <i>Dolichospermum</i>              | <p>TCTGAAGGAAGCATGACGAGGAAATCACTACGCTCTGGGGTTGTAGCCTCTTTTCTAATGGAAGAAGTGC<br/> TGTGGTACCTGGGTGTTAATCATCGTCTAACTCCGGGGAAGCTGCCGCGGTCTTACGGAGGATGCAAGC<br/> GTTATCCGGAATGATTGGGCGTAAAGGGTCCGCAGGTGGCATTGAAAGTCTGCTGTTTCAGAGGTTGGGTC<br/> AACCAAATAAGAGCAGTGGAAGCTACAAAGCTAGAGTTTGGTCGGGGCAGAGGGAATTCTTGGTGTAGC<br/> GGTGAATGCGTAGATATCAGGAAGAACACCAGTGGCGAAGGCGCTCTGCTAGGCCGAGACTGACACTG<br/> AGGGACGAAAGCTAGGGGAGCGAATGGGATTAGATACCCAGTAGTCCTAGCCGTAAACGATGGATACT<br/> AGGCGTAGCTCGTATCGACCCGAGCTGTGCCGGAGCTAACGCGTTAAGTATCCCGCCTGGGGAGTACGCA<br/> GGCAACTGTGAACTCAAAGGAATTGACGGGGGCCCGCACAAAGCGGTGGAGTATGTGGTTTAATTCGAT<br/> GCAACGCGAAGAACCTTACCAAGGCTTGACATGTACGAATCCTGTAGAAATATAGGAGTGCCTTCGGGA<br/> CGGTGAACACAGGTGGTGCATGGCTGTCGTCAGCTCGTGTGCTGAGATGTTGGGTAAAGTC<br/> TCTGACGGTACTTGAGGAATCAGCCTCGGCTAACTCCGTGCCAGCAGCCGCGGTAATACGGGGGAGGCA<br/> AGCGTTATCCGGAATTATTGGGCGTAAAGCGTCCGCAGGTGGTCAGCCAAGTCTGCTGTCAAATCAGGTT<br/> GCTTAACGACCTAAAGGCGGTGGAAGCTGGCAGACTAGAGAGCAGTAGGGGTAGCAGGAATTCCCAGTG<br/> TAGCGGTGAAATGCGTAGAGATTGGGAAGAACATCGGTGGCGAAAGCGTGCTACTGGGCTGTATCTGAC<br/> ACTCATGGACGAAAGCTAGGGGAGCGAAAGGGATTAA<br/> TCTCTACGCATTTACCGCTACACTGGGAATTTCTGCTGCCCCCTACTGCTCTCTAGTCTGCCAGTTTCCAC<br/> CGCCTTTAGGTGCTTAAGCAACCTGATTTGACAGCAGACTTGGCTGACCACCTGCGGACGCTTTACGCCCC<br/> AATAATTCCGGATAACGCTTGCCCTCCCCCGTATTACCGCGGCTGCTGGCACGGAGTTAGCCGATGCTGATT<br/> CCTCAAGTACCGTC<br/> TCTTGGGTTGTAAACCTCTTTTCTCAGGGAAGAACAGAAATGACGGTACCTGAGGAATAAGCATCGGCTAA<br/> CTCCGTGCCAGCAGCCGCGGTAATACGGAGGATGCAAGCGTTATCCGGAATGATTGGGCGTAAAGGGTCC<br/> GCAGGTGGCATTGAAAGTCTGCTGTTAAAGAGTTTGGCTCAACCAAATAAGAGCAGTGGAAGCTACAAA<br/> GCTAGAGTTTGGTCGGGGCAGAGGGAATTCCTGGTGTAGCGGTGAAATGCGTAGATATCAGGAAGAACA<br/> CCAGTGGCGAAGGCGCTCTGCTAGGCCGAGACTGACACTGAGGGACGAAAGCTAGGGGAGCGAATGGG<br/> ATTAGATACCCAGTAGTCCTAGCCGTAAACGATGGATACTAGGCGTAGCTCGTATCGACCCGAGCTGTG<br/> CCGGAGCTAACGCGTTAAGTATCCCGCCTGGGGAGTACGCAGGCAACTGTGAACTCAAAGGAATTGAC<br/> GGGGCCCCGCACAAGCGGTGGAGTATGTGGTTTAATTCGATGCAACGCGAAGAACCTTACCAAGGCTTGA<br/> CATGTACGAATCCTGTAGAAATATAGGAGTGCCTTCGGGAGCGTGAACACAGGTGGTGCATGGCTGTGCG<br/> TCAGCTCGTGTGCTGAGATGTTGGGTAAAGTCCCGCAACGAGCGCAAC<br/> AGCCGCGGTAATACGGGGGAGGCAAGCGTTATCCGGAATTATTGGGCGTAAAGCGTCCGCAGGTGGTCTG<br/> CCAAGTCTGCTGTCAAATCATGTTGCTTAACTACCTAAAGGCGGTGGAAGCTGGCAGACTAGAGAGCATT<br/> AGGGGTAGCAGGAATTCCCAGTGTAGCGGTGAAATGCGTAGATATTGGGAAGAACATCGGTGGCGAAAG<br/> CGTGCTACTGGGCTGTATCTGACACTCAGGGACGAAAGCTAGGGGAGCGAAAGGGAT<br/> AATGGGCGAAAGCCTGACGGAGCAACGCCGCGTGAGGGAGGAAGGTCTTTGGATTGTAAACCTCTTTTCT<br/> CAAGGAAGAAGTTCTGACGGTACTTGAGGAATCAGCCTCGGCTAACTCCGTGCCAGCAGCCGCGGTAATA<br/> CGGGGGAGGCAAGCGTTATCCGGAATTATTGGGCGTAAAGCGTCCGCAGGTGGTCAGCCAAGTCTGCCGT</p> |
| VL2.36.bis_359F | <i>Microcystis</i>                 | <p>TCTGACGGTACTTGAGGAATCAGCCTCGGCTAACTCCGTGCCAGCAGCCGCGGTAATACGGGGGAGGCA<br/> AGCGTTATCCGGAATTATTGGGCGTAAAGCGTCCGCAGGTGGTCAGCCAAGTCTGCTGTCAAATCAGGTT<br/> GCTTAACGACCTAAAGGCGGTGGAAGCTGGCAGACTAGAGAGCAGTAGGGGTAGCAGGAATTCCCAGTG<br/> TAGCGGTGAAATGCGTAGAGATTGGGAAGAACATCGGTGGCGAAAGCGTGCTACTGGGCTGTATCTGAC<br/> ACTCATGGACGAAAGCTAGGGGAGCGAAAGGGATTAA<br/> TCTCTACGCATTTACCGCTACACTGGGAATTTCTGCTGCCCCCTACTGCTCTCTAGTCTGCCAGTTTCCAC<br/> CGCCTTTAGGTGCTTAAGCAACCTGATTTGACAGCAGACTTGGCTGACCACCTGCGGACGCTTTACGCCCC<br/> AATAATTCCGGATAACGCTTGCCCTCCCCCGTATTACCGCGGCTGCTGGCACGGAGTTAGCCGATGCTGATT<br/> CCTCAAGTACCGTC<br/> TCTTGGGTTGTAAACCTCTTTTCTCAGGGAAGAACAGAAATGACGGTACCTGAGGAATAAGCATCGGCTAA<br/> CTCCGTGCCAGCAGCCGCGGTAATACGGAGGATGCAAGCGTTATCCGGAATGATTGGGCGTAAAGGGTCC<br/> GCAGGTGGCATTGAAAGTCTGCTGTTAAAGAGTTTGGCTCAACCAAATAAGAGCAGTGGAAGCTACAAA<br/> GCTAGAGTTTGGTCGGGGCAGAGGGAATTCCTGGTGTAGCGGTGAAATGCGTAGATATCAGGAAGAACA<br/> CCAGTGGCGAAGGCGCTCTGCTAGGCCGAGACTGACACTGAGGGACGAAAGCTAGGGGAGCGAATGGG<br/> ATTAGATACCCAGTAGTCCTAGCCGTAAACGATGGATACTAGGCGTAGCTCGTATCGACCCGAGCTGTG<br/> CCGGAGCTAACGCGTTAAGTATCCCGCCTGGGGAGTACGCAGGCAACTGTGAACTCAAAGGAATTGAC<br/> GGGGCCCCGCACAAGCGGTGGAGTATGTGGTTTAATTCGATGCAACGCGAAGAACCTTACCAAGGCTTGA<br/> CATGTACGAATCCTGTAGAAATATAGGAGTGCCTTCGGGAGCGTGAACACAGGTGGTGCATGGCTGTGCG<br/> TCAGCTCGTGTGCTGAGATGTTGGGTAAAGTCCCGCAACGAGCGCAAC<br/> AGCCGCGGTAATACGGGGGAGGCAAGCGTTATCCGGAATTATTGGGCGTAAAGCGTCCGCAGGTGGTCTG<br/> CCAAGTCTGCTGTCAAATCATGTTGCTTAACTACCTAAAGGCGGTGGAAGCTGGCAGACTAGAGAGCATT<br/> AGGGGTAGCAGGAATTCCCAGTGTAGCGGTGAAATGCGTAGATATTGGGAAGAACATCGGTGGCGAAAG<br/> CGTGCTACTGGGCTGTATCTGACACTCAGGGACGAAAGCTAGGGGAGCGAAAGGGAT<br/> AATGGGCGAAAGCCTGACGGAGCAACGCCGCGTGAGGGAGGAAGGTCTTTGGATTGTAAACCTCTTTTCT<br/> CAAGGAAGAAGTTCTGACGGTACTTGAGGAATCAGCCTCGGCTAACTCCGTGCCAGCAGCCGCGGTAATA<br/> CGGGGGAGGCAAGCGTTATCCGGAATTATTGGGCGTAAAGCGTCCGCAGGTGGTCAGCCAAGTCTGCCGT</p>                                                                                                                                                                                                                                                                                                                                                                                                                                                                                                                                                                                                                                                                                                                                                                         |
| VL2.36_781R     | <i>Microcystis</i>                 | <p>TCTCTACGCATTTACCGCTACACTGGGAATTTCTGCTGCCCCCTACTGCTCTCTAGTCTGCCAGTTTCCAC<br/> CGCCTTTAGGTGCTTAAGCAACCTGATTTGACAGCAGACTTGGCTGACCACCTGCGGACGCTTTACGCCCC<br/> AATAATTCCGGATAACGCTTGCCCTCCCCCGTATTACCGCGGCTGCTGGCACGGAGTTAGCCGATGCTGATT<br/> CCTCAAGTACCGTC<br/> TCTTGGGTTGTAAACCTCTTTTCTCAGGGAAGAACAGAAATGACGGTACCTGAGGAATAAGCATCGGCTAA<br/> CTCCGTGCCAGCAGCCGCGGTAATACGGAGGATGCAAGCGTTATCCGGAATGATTGGGCGTAAAGGGTCC<br/> GCAGGTGGCATTGAAAGTCTGCTGTTAAAGAGTTTGGCTCAACCAAATAAGAGCAGTGGAAGCTACAAA<br/> GCTAGAGTTTGGTCGGGGCAGAGGGAATTCCTGGTGTAGCGGTGAAATGCGTAGATATCAGGAAGAACA<br/> CCAGTGGCGAAGGCGCTCTGCTAGGCCGAGACTGACACTGAGGGACGAAAGCTAGGGGAGCGAATGGG<br/> ATTAGATACCCAGTAGTCCTAGCCGTAAACGATGGATACTAGGCGTAGCTCGTATCGACCCGAGCTGTG<br/> CCGGAGCTAACGCGTTAAGTATCCCGCCTGGGGAGTACGCAGGCAACTGTGAACTCAAAGGAATTGAC<br/> GGGGCCCCGCACAAGCGGTGGAGTATGTGGTTTAATTCGATGCAACGCGAAGAACCTTACCAAGGCTTGA<br/> CATGTACGAATCCTGTAGAAATATAGGAGTGCCTTCGGGAGCGTGAACACAGGTGGTGCATGGCTGTGCG<br/> TCAGCTCGTGTGCTGAGATGTTGGGTAAAGTCCCGCAACGAGCGCAAC<br/> AGCCGCGGTAATACGGGGGAGGCAAGCGTTATCCGGAATTATTGGGCGTAAAGCGTCCGCAGGTGGTCTG<br/> CCAAGTCTGCTGTCAAATCATGTTGCTTAACTACCTAAAGGCGGTGGAAGCTGGCAGACTAGAGAGCATT<br/> AGGGGTAGCAGGAATTCCCAGTGTAGCGGTGAAATGCGTAGATATTGGGAAGAACATCGGTGGCGAAAG<br/> CGTGCTACTGGGCTGTATCTGACACTCAGGGACGAAAGCTAGGGGAGCGAAAGGGAT<br/> AATGGGCGAAAGCCTGACGGAGCAACGCCGCGTGAGGGAGGAAGGTCTTTGGATTGTAAACCTCTTTTCT<br/> CAAGGAAGAAGTTCTGACGGTACTTGAGGAATCAGCCTCGGCTAACTCCGTGCCAGCAGCCGCGGTAATA<br/> CGGGGGAGGCAAGCGTTATCCGGAATTATTGGGCGTAAAGCGTCCGCAGGTGGTCAGCCAAGTCTGCCGT</p>                                                                                                                                                                                                                                                                                                                                                                                                                                                                                                                                                                                                                                                                                                                                                                                                                                                                                                                                                                                                                                                                                                                                 |
| VL3.34_359F     | <i>Dolichospermum</i>              | <p>TCTTGGGTTGTAAACCTCTTTTCTCAGGGAAGAACAGAAATGACGGTACCTGAGGAATAAGCATCGGCTAA<br/> CTCCGTGCCAGCAGCCGCGGTAATACGGAGGATGCAAGCGTTATCCGGAATGATTGGGCGTAAAGGGTCC<br/> GCAGGTGGCATTGAAAGTCTGCTGTTAAAGAGTTTGGCTCAACCAAATAAGAGCAGTGGAAGCTACAAA<br/> GCTAGAGTTTGGTCGGGGCAGAGGGAATTCCTGGTGTAGCGGTGAAATGCGTAGATATCAGGAAGAACA<br/> CCAGTGGCGAAGGCGCTCTGCTAGGCCGAGACTGACACTGAGGGACGAAAGCTAGGGGAGCGAATGGG<br/> ATTAGATACCCAGTAGTCCTAGCCGTAAACGATGGATACTAGGCGTAGCTCGTATCGACCCGAGCTGTG<br/> CCGGAGCTAACGCGTTAAGTATCCCGCCTGGGGAGTACGCAGGCAACTGTGAACTCAAAGGAATTGAC<br/> GGGGCCCCGCACAAGCGGTGGAGTATGTGGTTTAATTCGATGCAACGCGAAGAACCTTACCAAGGCTTGA<br/> CATGTACGAATCCTGTAGAAATATAGGAGTGCCTTCGGGAGCGTGAACACAGGTGGTGCATGGCTGTGCG<br/> TCAGCTCGTGTGCTGAGATGTTGGGTAAAGTCCCGCAACGAGCGCAAC<br/> AGCCGCGGTAATACGGGGGAGGCAAGCGTTATCCGGAATTATTGGGCGTAAAGCGTCCGCAGGTGGTCTG<br/> CCAAGTCTGCTGTCAAATCATGTTGCTTAACTACCTAAAGGCGGTGGAAGCTGGCAGACTAGAGAGCATT<br/> AGGGGTAGCAGGAATTCCCAGTGTAGCGGTGAAATGCGTAGATATTGGGAAGAACATCGGTGGCGAAAG<br/> CGTGCTACTGGGCTGTATCTGACACTCAGGGACGAAAGCTAGGGGAGCGAAAGGGAT<br/> AATGGGCGAAAGCCTGACGGAGCAACGCCGCGTGAGGGAGGAAGGTCTTTGGATTGTAAACCTCTTTTCT<br/> CAAGGAAGAAGTTCTGACGGTACTTGAGGAATCAGCCTCGGCTAACTCCGTGCCAGCAGCCGCGGTAATA<br/> CGGGGGAGGCAAGCGTTATCCGGAATTATTGGGCGTAAAGCGTCCGCAGGTGGTCAGCCAAGTCTGCCGT</p>                                                                                                                                                                                                                                                                                                                                                                                                                                                                                                                                                                                                                                                                                                                                                                                                                                                                                                                                                                                                                                                                                                                                                                                                                                                                                                                                                                                             |
| BL1.29_359F     | <i>Synechococcus/ Merismopedia</i> | <p>AGCCGCGGTAATACGGGGGAGGCAAGCGTTATCCGGAATTATTGGGCGTAAAGCGTCCGCAGGTGGTCTG<br/> CCAAGTCTGCTGTCAAATCATGTTGCTTAACTACCTAAAGGCGGTGGAAGCTGGCAGACTAGAGAGCATT<br/> AGGGGTAGCAGGAATTCCCAGTGTAGCGGTGAAATGCGTAGATATTGGGAAGAACATCGGTGGCGAAAG<br/> CGTGCTACTGGGCTGTATCTGACACTCAGGGACGAAAGCTAGGGGAGCGAAAGGGAT<br/> AATGGGCGAAAGCCTGACGGAGCAACGCCGCGTGAGGGAGGAAGGTCTTTGGATTGTAAACCTCTTTTCT<br/> CAAGGAAGAAGTTCTGACGGTACTTGAGGAATCAGCCTCGGCTAACTCCGTGCCAGCAGCCGCGGTAATA<br/> CGGGGGAGGCAAGCGTTATCCGGAATTATTGGGCGTAAAGCGTCCGCAGGTGGTCAGCCAAGTCTGCCGT</p>                                                                                                                                                                                                                                                                                                                                                                                                                                                                                                                                                                                                                                                                                                                                                                                                                                                                                                                                                                                                                                                                                                                                                                                                                                                                                                                                                                                                                                                                                                                                                                                                                                                                                                                                                                                                                                                                                                                                                                                                                                                                                                                                                         |
| BL1.29_781R     | <i>Microcystis</i>                 | <p>AGCCGCGGTAATACGGGGGAGGCAAGCGTTATCCGGAATTATTGGGCGTAAAGCGTCCGCAGGTGGTCTG<br/> CCAAGTCTGCTGTCAAATCATGTTGCTTAACTACCTAAAGGCGGTGGAAGCTGGCAGACTAGAGAGCATT<br/> AGGGGTAGCAGGAATTCCCAGTGTAGCGGTGAAATGCGTAGATATTGGGAAGAACATCGGTGGCGAAAG<br/> CGTGCTACTGGGCTGTATCTGACACTCAGGGACGAAAGCTAGGGGAGCGAAAGGGAT<br/> AATGGGCGAAAGCCTGACGGAGCAACGCCGCGTGAGGGAGGAAGGTCTTTGGATTGTAAACCTCTTTTCT<br/> CAAGGAAGAAGTTCTGACGGTACTTGAGGAATCAGCCTCGGCTAACTCCGTGCCAGCAGCCGCGGTAATA<br/> CGGGGGAGGCAAGCGTTATCCGGAATTATTGGGCGTAAAGCGTCCGCAGGTGGTCAGCCAAGTCTGCCGT</p>                                                                                                                                                                                                                                                                                                                                                                                                                                                                                                                                                                                                                                                                                                                                                                                                                                                                                                                                                                                                                                                                                                                                                                                                                                                                                                                                                                                                                                                                                                                                                                                                                                                                                                                                                                                                                                                                                                                                                                                                                                                                                                                                                         |



|             |                       |                                                                                                                                                                                                                                                                                                                                                                                                                                                                                                                                                                                                                                                                                                                                                                                                                                                                                                                                                                                                                                                                                                                                                                                                                                                                                                                                                                                                                                                                                                                                                                                                                                                                                                                                                                                                                                                                                                                                                                                                                                                                                                                                                                                                                                                                                                                                                                                                                                                                                                                                                                                            |
|-------------|-----------------------|--------------------------------------------------------------------------------------------------------------------------------------------------------------------------------------------------------------------------------------------------------------------------------------------------------------------------------------------------------------------------------------------------------------------------------------------------------------------------------------------------------------------------------------------------------------------------------------------------------------------------------------------------------------------------------------------------------------------------------------------------------------------------------------------------------------------------------------------------------------------------------------------------------------------------------------------------------------------------------------------------------------------------------------------------------------------------------------------------------------------------------------------------------------------------------------------------------------------------------------------------------------------------------------------------------------------------------------------------------------------------------------------------------------------------------------------------------------------------------------------------------------------------------------------------------------------------------------------------------------------------------------------------------------------------------------------------------------------------------------------------------------------------------------------------------------------------------------------------------------------------------------------------------------------------------------------------------------------------------------------------------------------------------------------------------------------------------------------------------------------------------------------------------------------------------------------------------------------------------------------------------------------------------------------------------------------------------------------------------------------------------------------------------------------------------------------------------------------------------------------------------------------------------------------------------------------------------------------|
| BL1.30_781R | <i>Microcystis</i>    | CAAATCAGGTTGCTTAACGACCTAAAGGCGGTGGAAACTGGCAGACTAGAGAGCAGTAGGGGTAGCAGG<br>AATTCCCAGTGTAGCGGTGAAATGCGTAGAGATTGGGAAGAACATCGGTGGCGAAAGCGTGC<br>CAATGGGCGAAAGCCTGACGGAGCAACGCCGCGTGAGGGAGGAAGGTCTTTGGATTGTAAACCTCTTTTC<br>TCAAGGAAGAAGTTCTGACGGTACTTGAGGAATCAGCCTCGGCTAACTCCGTGCCAGCAGCCGCGGTAAT<br>ACGGGGGAGGCAAGCGTTATCCGGAATTATTGGGCGTAAAGCGTCCGCAGGTGGTCAGCCAAGTCTGCC<br>GTCAAATCAGGTTGCTTAACGACCTAAAGGCGGTGGAAACTGGCAGACTAGAGAGCAGTAGGGGTAGCA<br>GGAAATTCCCAGTGTAGCGGTGAAATGCGTAGAGATTGGGAAGAAACATCGGTGGCGAAAAGCGTGC<br>GGCTCTTGGGTTGTAAACCTCTTTTCTCAGGGAAGAACAGAATGACGGTACCTGAGGAATAAGCATCGGC<br>TAACTCCGTGCCAGCAGCCGCGGTAATACGGAGGATGCAAGCGTTATCCGGAATGATTGGGCGTAAAGG<br>GTCCGCAGGTGGCATTGTAAAGTCTGCTGTTAAAGAGTTTGGCTCAACCAAATAAGAGCAGTGGAAGTAC<br>AAAGCTAGAGTGTGGTCGGGGCAGAGGGAATTCCTGGTGTAGCGGTGAAATGCGTAGATATCAGGAAGA<br>ACACCAGTGGCGAAGGCGCTCTGCTAGGCCGAGACTGACACTGAGGGACGAAAGCTAGGGGAGCGAAT<br>GGGATTAGATACCCAGTAGTCTAGCCGTAAACGATGGATACTAGGCGTAGCTCGTATCGACCCGAGCT<br>GTGCCGGAGCTAACGCGTTAAGTATCCCGCCTGGGGAGTACGCAGGCAACTGTGAAACTCAAAGGAATT<br>GACGGGGGCCCCGCACAAGCGGTGGAGTATGTGGTTTAATTCGATGCAACGCGAAGAACCTTACCAAGGC<br>TTGACATGTCACGAATCCTATTGAAAGATGGGAGTGCCTTCGGGAGCGTGAACACAGGTGGTGCATGGCT<br>GTCGTCAGCTCGTGTCGTGAGATGT<br>TCCGATTATGTTCTACTTTCTCGGGAGCAGCTCTGTGGGATTGTAAACCTCTTTATCTCAGGGTAAGAAACA<br>ATGACGGTACGTGAGGAATAGGCATCGGCTAACTCCGTGCCAGCAGCCGCGGTAATACGGAGGATGCAA<br>GCGTTATCCGGAATGATTGGGCGTAAAGAGTCCGTAGGTGGCATTGAAAGTCTGCTGTTAAAGAGTCTAG<br>CTCAACTAGATAAGAGCAGTGGAAGTACAAAGCTAGAGTTTGGTCGGGGCAGAAGGAATTCCTGGTGT<br>AGCGGTGAAATGCGTAGATATCAGGAAGAACACCGGTGGCGAAGGCGTTCTGCTAGGCCGAGACTGACA<br>CTGAGGGACGAAAGCTAGGGGAGCGAATGGGATTAGATACCCAGTAGTCCTAGCCGTAAACGATGGAT<br>ACTAGGCGTAGCTCGTATCGACCCGAGCTGTGCCGGAGCTAACGCGTTAAGTATCCCGCCTGGGGAGTAC<br>GCAGGCAACTGTGAAACTCAAAGGAATTGACGGGGGCCCCGCACAAGCGGTGGAGTATGTGGTTTAATTC<br>GATGCAACGCGAAGAACCTTACCAAGGCTTGACATGTCACGAATCCTGTAGAAATATAGGAGTGCCTTCG<br>GGAGCGTGAACACAGGTGGTGCATGGCTGTCGTCAGCTCGTGTCGTGAGATG<br>TCCGGAAGGGGCCGCACGGTCGCGTAGGACGCTCTGGCGTTCTCTCTCTTTCTCACGGAAGAAAAGAT<br>GACGGTACCTGAGGAATAGGCATCGGGTAACTCCGTGCCAGCAGCCGCGGTAATACGGAGGATGCAAGC<br>GTTATCCGGAATGATTGGGCGTAAAGGGTCCGCAGGTGGCATTGAAAGTCTGCTGTTAAAGAGTCTAGCT<br>CAACTAGATAAGAGCAGTGGAAGTACAAAGCTAGAGTTTGGTCGGGGCAGAAGGAATTCCTGGTGTAG<br>CGGTGAAATGCGTAGATATCAGGAAGAACACCAGTGGCGAAGGCGTTCTGCTAGGCCGAGACTGACACT<br>GAGGGACGAAAGCTAGGGGAGCGAATGGGATTAGATACCCAGTAGTCCTAGCCGTAAACGATGGATAC<br>TAGGCGTAGCTCGTATCGACCCGAGCTGTGCCGGAGCTAACGCGTTAAGTATCCCGCCTGGGGAGTACGC<br>AGGCAACTGTGAAACTCAAAGGAATTGACGGGGGCCCCGCACAAGCGGTGGAGTATGTGGTTTAATTCGA |
| BL4.35_359F | <i>Aphanizomenon</i>  |                                                                                                                                                                                                                                                                                                                                                                                                                                                                                                                                                                                                                                                                                                                                                                                                                                                                                                                                                                                                                                                                                                                                                                                                                                                                                                                                                                                                                                                                                                                                                                                                                                                                                                                                                                                                                                                                                                                                                                                                                                                                                                                                                                                                                                                                                                                                                                                                                                                                                                                                                                                            |
| BL5.29_359F | <i>Dolichospermum</i> |                                                                                                                                                                                                                                                                                                                                                                                                                                                                                                                                                                                                                                                                                                                                                                                                                                                                                                                                                                                                                                                                                                                                                                                                                                                                                                                                                                                                                                                                                                                                                                                                                                                                                                                                                                                                                                                                                                                                                                                                                                                                                                                                                                                                                                                                                                                                                                                                                                                                                                                                                                                            |
| BL5.35_359F | <i>Dolichospermum</i> |                                                                                                                                                                                                                                                                                                                                                                                                                                                                                                                                                                                                                                                                                                                                                                                                                                                                                                                                                                                                                                                                                                                                                                                                                                                                                                                                                                                                                                                                                                                                                                                                                                                                                                                                                                                                                                                                                                                                                                                                                                                                                                                                                                                                                                                                                                                                                                                                                                                                                                                                                                                            |

---



|               |                       |                                                                                                                                                                                                                                                                                                                                                                                                                                                                                                                                                                                                                                                                                                                                                                                                                                                                                                                                                                                                                                                                                                                                                                                                                                                                                                                                                                                                                                                                                                                                                                                                                                                 |
|---------------|-----------------------|-------------------------------------------------------------------------------------------------------------------------------------------------------------------------------------------------------------------------------------------------------------------------------------------------------------------------------------------------------------------------------------------------------------------------------------------------------------------------------------------------------------------------------------------------------------------------------------------------------------------------------------------------------------------------------------------------------------------------------------------------------------------------------------------------------------------------------------------------------------------------------------------------------------------------------------------------------------------------------------------------------------------------------------------------------------------------------------------------------------------------------------------------------------------------------------------------------------------------------------------------------------------------------------------------------------------------------------------------------------------------------------------------------------------------------------------------------------------------------------------------------------------------------------------------------------------------------------------------------------------------------------------------|
| BL6.29_359F   | <i>Dolichospermum</i> | TGCAACGCGAAGAACCTTACCAAGGCTTGACATGTCACGAATCCTGTGGAACATAGGAGTGCCTTCGGG<br>AGCGTGAACACAGGTGGTGCATGGCTGTCGTCAGCTCGTGTCTGTGAGATGTTGGG<br>AGGCTCTTGGGTTGTAAACCTCTTTTCTCAGGGAAGAAAAAATGACGGTACCTGAGGAATAAGCATCGG<br>CTAACTCCGTGCCAGCAGCCGCGGTAATACGGAGGATGCAAGCGTTATCCGGAATGATTGGGCGTAAAG<br>GGTCCGCAGGTGGCATTGAAAGTCTGCTGTAAAGAGTCTAGCTCAACTAGATAAAGAGCAGTGGAAGCTA<br>CAAAGCTAGAGTTTGGTCGGGGCAGAAGGAATTCCTGGTGTAGCGGTGAAATGCGTAGATATCAGGAAG<br>AACACCAGTGGCGAAGGCGTTCTGCTAGGCCGAGACTGACACTGAGGGACGAAAGCTAGGGGAGCGAAT<br>GGGATTAGATAACCCAGTAGTCCTAGCCGTAAACGATGGATACTAGGCGTAGCTCGTATCGACCCGAGCT<br>GTGCCGGAGCTAACGCGTTAAGTATCCCGCCTGGGGAGTACGCAGGCAACTGTGAAACTCAAAGGAATT<br>GACGGGGGCCCCGCACAAGCGGTGGAGTATGTGGTTTAATTTCGATGCAACGCGAA<br>GGCTCTTGGGTTGTAACCTCTTTTCTCAGGGAAGAACAGAATGACGGTACCTGAGGAATAAGCATCGGCT<br>AACTCCGTGCCAGCAGCCGCGGTAATACGGAGGATGCAAGCGTTATCCGGAATGATTGGGCGTAAAGGG<br>TCCGCAGGTGGCATTGAAAGTCTGCTGTAAAGAGTTTGGCTCAACCAAATAAGAGCAGTGGAAGCTACA<br>AAGCTAGAGTTTGGTCGGGGCAGAGGGAATTCCTGGTGTAGCGGTGAAATGCGTAGATATCAGGAAGAA<br>CACCAGTGGCGAAGGCGCTCTGCTAGGCCGAGACTGACACTGAGGGACGAAAGCTAGGGGAGCGAATG<br>GGATTAGATAACCCAGTAGTCCTAGCCGTAAACGATGGATACTAGGCGTAGCTCGTATCGACCCGAGCTG<br>TGCCGGAGCTAACGCGTTAAGTATCCCGCCTGGGGAGTACGCAGGCAACTGTGAAACTCAAAGGAATTG<br>ACGGGGGCCCCGCACAAGCGGTGGAGTATGTGGTTTAATTTCGATGCAACGCGAAG<br>GCCTCGGCTAACTCCGTGCCAGCAGCCGCGGTAATACGGGGGAGGCAAGCGTTATCCGGAATTATTGGGC<br>GTAAAGCGTCCGCAGGTGGTCAGCCAAGTCTGCCGTCAAATCAGGTTGCTTAACGACCTAAAGGCGGTGG<br>AAACTGGCAGACTAGAGAGCAGTAGGGGTAGCAGGAATTTCCAGTGTAGCGGTGAAATGCGTAGAGAT<br>TGGGAAGAACATCGGTGGCGAAAGCGTGCTACTGGGCTGTATCTGACACTCAGGGACGAAAGCTAGGGG<br>AGCGAAAGGGAT |
| BL7.30_359F   | <i>Dolichospermum</i> | TATAGCATCGTTTTATTCCCAATTGTTTAATTTCAAACGTGGGTTGAAAAGACGCTGGGTTACACAGATAC<br>TTGCATTTGAAGTGTAATTATTTGGAGATTCAGCAGAACCTTGACAACCTGCATAGGTAAGTCTGGAAAGA<br>AAGCATCTCATAGATGTCCAGAAGCGAAAGCGAC<br>TCCGTGCCAGCAGCCGCGGTAATACGGGGGAGGCAAGCGTTATCCGGAATCATTGGGCGTAAAGCGTCC<br>GCAGGTGGTCAGCCAAGTCAGCTGTCAAATCAGGTGCTTAACGACATAAAGGCGGTGGAAACTGGCAG<br>ACTAGAGAGCAGTAGGGGTAGCGGGAATTCAGTGTAGCGGTGAAATGCGTAGAG<br>AGCAAACCCGGCGTCAGTTCAGATTGCAGGCTGCAACTCGCCTGCATGAAGGAGGAATCGCTAGTAATCG<br>CCGGTCAGCATAACGGCGGTGAATTCGTTCCCGGGCCTTGACACACCGCCCGTCACACCATGGAAGCTGG<br>TCACGCCCCGAAGTCATTACCTCAACCGCAAGGAGGGGGATGCCTAAGGCAGGGGCTAGTGACTGGGGTGA<br>AGTCGTAACAAGGTAGCCGTACCGGAAGGTGTGGCTGGATCACCTCCTTAAAGGGAGACCTAATTCAGGT<br>ATAAGACGAAAAAAAAGTAGTCCCTACCAAGAATCAATCCCAAAGGTTCGGAACGAGGTATGAGGCTTT<br>CAAAGTGGTTCTGGGTTTATAAAAGACCTGAATCAGGAACAAGGGCTATTAGCTCAGGTGGTTAGAGCG                                                                                                                                                                                                                                                                                                                                                                                                                                                                                                                                                                                                                                                                                                                                                                                  |
| BL8.35_359F   | <i>Microcystis</i>    | TATAGCATCGTTTTATTCCCAATTGTTTAATTTCAAACGTGGGTTGAAAAGACGCTGGGTTACACAGATAC<br>TTGCATTTGAAGTGTAATTATTTGGAGATTCAGCAGAACCTTGACAACCTGCATAGGTAAGTCTGGAAAGA<br>AAGCATCTCATAGATGTCCAGAAGCGAAAGCGAC<br>TCCGTGCCAGCAGCCGCGGTAATACGGGGGAGGCAAGCGTTATCCGGAATCATTGGGCGTAAAGCGTCC<br>GCAGGTGGTCAGCCAAGTCAGCTGTCAAATCAGGTGCTTAACGACATAAAGGCGGTGGAAACTGGCAG<br>ACTAGAGAGCAGTAGGGGTAGCGGGAATTCAGTGTAGCGGTGAAATGCGTAGAG<br>AGCAAACCCGGCGTCAGTTCAGATTGCAGGCTGCAACTCGCCTGCATGAAGGAGGAATCGCTAGTAATCG<br>CCGGTCAGCATAACGGCGGTGAATTCGTTCCCGGGCCTTGACACACCGCCCGTCACACCATGGAAGCTGG<br>TCACGCCCCGAAGTCATTACCTCAACCGCAAGGAGGGGGATGCCTAAGGCAGGGGCTAGTGACTGGGGTGA<br>AGTCGTAACAAGGTAGCCGTACCGGAAGGTGTGGCTGGATCACCTCCTTAAAGGGAGACCTAATTCAGGT<br>ATAAGACGAAAAAAAAGTAGTCCCTACCAAGAATCAATCCCAAAGGTTCGGAACGAGGTATGAGGCTTT<br>CAAAGTGGTTCTGGGTTTATAAAAGACCTGAATCAGGAACAAGGGCTATTAGCTCAGGTGGTTAGAGCG                                                                                                                                                                                                                                                                                                                                                                                                                                                                                                                                                                                                                                                                                                                                                                                  |
| BV1.34_23S30R | <i>Synechococcus</i>  | TATAGCATCGTTTTATTCCCAATTGTTTAATTTCAAACGTGGGTTGAAAAGACGCTGGGTTACACAGATAC<br>TTGCATTTGAAGTGTAATTATTTGGAGATTCAGCAGAACCTTGACAACCTGCATAGGTAAGTCTGGAAAGA<br>AAGCATCTCATAGATGTCCAGAAGCGAAAGCGAC<br>TCCGTGCCAGCAGCCGCGGTAATACGGGGGAGGCAAGCGTTATCCGGAATCATTGGGCGTAAAGCGTCC<br>GCAGGTGGTCAGCCAAGTCAGCTGTCAAATCAGGTGCTTAACGACATAAAGGCGGTGGAAACTGGCAG<br>ACTAGAGAGCAGTAGGGGTAGCGGGAATTCAGTGTAGCGGTGAAATGCGTAGAG<br>AGCAAACCCGGCGTCAGTTCAGATTGCAGGCTGCAACTCGCCTGCATGAAGGAGGAATCGCTAGTAATCG<br>CCGGTCAGCATAACGGCGGTGAATTCGTTCCCGGGCCTTGACACACCGCCCGTCACACCATGGAAGCTGG<br>TCACGCCCCGAAGTCATTACCTCAACCGCAAGGAGGGGGATGCCTAAGGCAGGGGCTAGTGACTGGGGTGA<br>AGTCGTAACAAGGTAGCCGTACCGGAAGGTGTGGCTGGATCACCTCCTTAAAGGGAGACCTAATTCAGGT<br>ATAAGACGAAAAAAAAGTAGTCCCTACCAAGAATCAATCCCAAAGGTTCGGAACGAGGTATGAGGCTTT<br>CAAAGTGGTTCTGGGTTTATAAAAGACCTGAATCAGGAACAAGGGCTATTAGCTCAGGTGGTTAGAGCG                                                                                                                                                                                                                                                                                                                                                                                                                                                                                                                                                                                                                                                                                                                                                                                  |
| BV1.34_781R   | <i>Microcystis</i>    | TATAGCATCGTTTTATTCCCAATTGTTTAATTTCAAACGTGGGTTGAAAAGACGCTGGGTTACACAGATAC<br>TTGCATTTGAAGTGTAATTATTTGGAGATTCAGCAGAACCTTGACAACCTGCATAGGTAAGTCTGGAAAGA<br>AAGCATCTCATAGATGTCCAGAAGCGAAAGCGAC<br>TCCGTGCCAGCAGCCGCGGTAATACGGGGGAGGCAAGCGTTATCCGGAATCATTGGGCGTAAAGCGTCC<br>GCAGGTGGTCAGCCAAGTCAGCTGTCAAATCAGGTGCTTAACGACATAAAGGCGGTGGAAACTGGCAG<br>ACTAGAGAGCAGTAGGGGTAGCGGGAATTCAGTGTAGCGGTGAAATGCGTAGAG<br>AGCAAACCCGGCGTCAGTTCAGATTGCAGGCTGCAACTCGCCTGCATGAAGGAGGAATCGCTAGTAATCG<br>CCGGTCAGCATAACGGCGGTGAATTCGTTCCCGGGCCTTGACACACCGCCCGTCACACCATGGAAGCTGG<br>TCACGCCCCGAAGTCATTACCTCAACCGCAAGGAGGGGGATGCCTAAGGCAGGGGCTAGTGACTGGGGTGA<br>AGTCGTAACAAGGTAGCCGTACCGGAAGGTGTGGCTGGATCACCTCCTTAAAGGGAGACCTAATTCAGGT<br>ATAAGACGAAAAAAAAGTAGTCCCTACCAAGAATCAATCCCAAAGGTTCGGAACGAGGTATGAGGCTTT<br>CAAAGTGGTTCTGGGTTTATAAAAGACCTGAATCAGGAACAAGGGCTATTAGCTCAGGTGGTTAGAGCG                                                                                                                                                                                                                                                                                                                                                                                                                                                                                                                                                                                                                                                                                                                                                                                  |
| BV2.34_23S30R | <i>Microcystis</i>    | TATAGCATCGTTTTATTCCCAATTGTTTAATTTCAAACGTGGGTTGAAAAGACGCTGGGTTACACAGATAC<br>TTGCATTTGAAGTGTAATTATTTGGAGATTCAGCAGAACCTTGACAACCTGCATAGGTAAGTCTGGAAAGA<br>AAGCATCTCATAGATGTCCAGAAGCGAAAGCGAC<br>TCCGTGCCAGCAGCCGCGGTAATACGGGGGAGGCAAGCGTTATCCGGAATCATTGGGCGTAAAGCGTCC<br>GCAGGTGGTCAGCCAAGTCAGCTGTCAAATCAGGTGCTTAACGACATAAAGGCGGTGGAAACTGGCAG<br>ACTAGAGAGCAGTAGGGGTAGCGGGAATTCAGTGTAGCGGTGAAATGCGTAGAG<br>AGCAAACCCGGCGTCAGTTCAGATTGCAGGCTGCAACTCGCCTGCATGAAGGAGGAATCGCTAGTAATCG<br>CCGGTCAGCATAACGGCGGTGAATTCGTTCCCGGGCCTTGACACACCGCCCGTCACACCATGGAAGCTGG<br>TCACGCCCCGAAGTCATTACCTCAACCGCAAGGAGGGGGATGCCTAAGGCAGGGGCTAGTGACTGGGGTGA<br>AGTCGTAACAAGGTAGCCGTACCGGAAGGTGTGGCTGGATCACCTCCTTAAAGGGAGACCTAATTCAGGT<br>ATAAGACGAAAAAAAAGTAGTCCCTACCAAGAATCAATCCCAAAGGTTCGGAACGAGGTATGAGGCTTT<br>CAAAGTGGTTCTGGGTTTATAAAAGACCTGAATCAGGAACAAGGGCTATTAGCTCAGGTGGTTAGAGCG                                                                                                                                                                                                                                                                                                                                                                                                                                                                                                                                                                                                                                                                                                                                                                                  |



|             |                      |                                                                                                                                                                                                                                                                                                                                                                                                                                                                                                                                                                                                                                                                                                                                                                                                                                                                                                                                                                                                                                                                                                                                                                                                                                                                                                                                                                                                                                                                                                                                                                                                                                                                                                                                                                                                                                                                                                                                                                                                                                                                                                                                                                                                                                                                                                                                                                                                                                                                                                                                                                                                           |
|-------------|----------------------|-----------------------------------------------------------------------------------------------------------------------------------------------------------------------------------------------------------------------------------------------------------------------------------------------------------------------------------------------------------------------------------------------------------------------------------------------------------------------------------------------------------------------------------------------------------------------------------------------------------------------------------------------------------------------------------------------------------------------------------------------------------------------------------------------------------------------------------------------------------------------------------------------------------------------------------------------------------------------------------------------------------------------------------------------------------------------------------------------------------------------------------------------------------------------------------------------------------------------------------------------------------------------------------------------------------------------------------------------------------------------------------------------------------------------------------------------------------------------------------------------------------------------------------------------------------------------------------------------------------------------------------------------------------------------------------------------------------------------------------------------------------------------------------------------------------------------------------------------------------------------------------------------------------------------------------------------------------------------------------------------------------------------------------------------------------------------------------------------------------------------------------------------------------------------------------------------------------------------------------------------------------------------------------------------------------------------------------------------------------------------------------------------------------------------------------------------------------------------------------------------------------------------------------------------------------------------------------------------------------|
| BV2.35_359F | <i>Synechococcus</i> | CACCCTGATAAGGGTGAGGTCCCTGGTTCGAGTCCAGGATGGCCCACCTGCACAGGTGGCAAAAACAA<br>GAGAAGCGAGGAATCAGCACCTTATCTTATATACATATATAAGAGAGAATGCTGGCTCTGAGT<br>TGTAACCTCTTTTCTCAAGGAAGAAGTTCTGACGGTACTTGAGGAATCAGCCACGGCTAATTCCGTGCCAG<br>CAGCCGCGGTAATACGGGGGTGGCAAGCGTTATCCGGAATCATTGGGCGTAAAGCGTCCGCAGGTGGCTT<br>TGTAAGTCTGCTGTTAAAGCGTGGAGCTTAACTCCCTTTCAGCGGTGGAAACTGCAAACTTGAGTGTGGT<br>AGGGGCAGAGGGAATCCCCGGTGTAGCGGTGAAATGCGTAGATATCGGGAAGAACACCAGTGGCGAAG<br>GCGCTCTGCTGGGCCATATCTGACACTCATGGACGAAAGCCAGGGGAGCGAAAGGGATTAGATAACCCCT<br>GTAGTCCTGGCCGTAAACGATGAACACTAGGCGTCGGGGGAATCGACCCCTCGGTGTCGTAGCCAACGC<br>GTTAAGTGTTCGCTGGGGAGTACGCACGCAAGTGTGAAACTCAAAGGAATTGACGGGGGCCCCGCACA<br>AGCGGTGGAGTATGTGGTTTAATTCGATGCAACGCGAAGAACCTTACCAGACTTGACA<br>TCCGCTTAACAACACAGCCGCTCAGGCTATGTACGTTCTGTGGATGTAACCTCTTTTCTCAGGGAAGACAT<br>CTGACGGTACCTGAGGAATAAACGTCGAAGTAACTCCGTGCCAGCAGCCGCGGTAATACGGAGGATGCA<br>AGCGTTATCCGGAATGATTGGGCGTAAAGCGTCCGCAGGTGGTTTTTCAAGTCTGCTGTTAAAGACCGGG<br>GCTTAACTCCAGGCAAGCAGTGGAAACTGAAAGACTAGAGTATGGTAGGGGCAGAGGGAATTCCTGGTG<br>TAGCGGTGAAATGCGTAGAGCTCAGGAAGAACATCGGTGGCGAAGGCGCTCTGCTAGGCCGAAACTGAC<br>ACTCAGGGACGAAAGCTAGGGGAGCGAATGGGATTAGATACCCAGTAGTCCTAGCTGTAAACGATGGA<br>TACTAGGTGTTGTCTGTATCGACCCGAAGTGTGCCGTAGCTAACGCGTTAAGTATCCCGCTGGGGAGTAC<br>GCACGCAAGTGTGAAACTCAAAGGAATTGACGGGGGCCCCGCACAAGCGGTGGAGTATGTGGTTTAATTC<br>GATGCAACGCGA<br>CTTTTCTCAGGGAAGAACACAATGACGGTACCTGAGGAATAAGCATCGGCTAACTCCGTGCCAGCAGCCG<br>CGGTAATACGGGGGATGCAAGCGTTATCCGGAATGATTGGGCGTAAAGGGTCCGCAGGTGGCATTGCAA<br>GTCTGCTGTTAAAGAGTTTGGCTCAACCTCATAAAAGCAGTGGAAACTGCAAGCTAGAGTGTGGTCCGG<br>GCAGAGGGAATTCCTGGTGTAGCGGTGAAATGCGTAGAGATCAGGAAGAACACCGGTGGCGAAGGCGCT<br>CTGCTAGGCCATAACTGACACTGAGGGACGAAAGCTAGGGGAGCGAATGGGATTAGATACCCAGTAGT<br>CCTAGCCGTAAACGATGGATACTAGGCGTGGCTCGTATCGACCCGAGCTGTGCCGTAGCTAACGCGTTAA<br>GTATCCCGCTGGGGAGTACGCACGCAACTGTGAAACTCAAAGGAATTGACGGGGGCCCCGCACAAGCGG<br>TGGAGTATGTGGTTTAATTCGATGCAACGCGAAGAACCTTACCAAGGCTTGACATCTC<br>TACGGAGGATGCAAGCGTTATCCGGAATGATTGGGCGTAAAGGGTCCGCAGGTGGCATTGTAAGTCTGCT<br>GTTAAAGAGTTTGGCTCAACCAAATAAAAGCAGTGGAAACTACAAAGCTAGAGTGTGGTCCGGGCAGAG<br>GGAATTCCTGGTGTAGCGGTGAAATGCGTAGATATCAGGAAGAACACCGGTGGCGAAGGCGCTCTGCTA<br>GGCCAAGACTGACACTGAGGGACGAAAGCTAGGGGAGCGAATGGGATTAGATACCCAGTAGTCCTAGC<br>CGTAAACGATGGATACTAGGCGTAGCTCGTATCGACCCGAGCTGTGCCGTAGCTAACGCGTTAAGTATCC<br>CGCCTGGGGAGTACGCAGGCAACTGTGAAACTCAAAGGAATTGACGGGGGCCCCGCACAAGCGGTGGAGT<br>ATGTGGTTTAATTCGATGCAACGCGA<br>CGGAGCAAGACCGCGTGGGGGAGGAAGGTTCTTGATTGTCAACCCCTTTTTTCAGGGAAGAACACAATG<br>ACGGTACCTGAGGAATAAGCATCGGCTAACTCCGTGCCAGCAGCCGCGGTAATACGGGGGATGCAAGCG |
| BV3.35_359F | <i>Phormidium</i>    | GATGCAACGCGA<br>CTTTTCTCAGGGAAGAACACAATGACGGTACCTGAGGAATAAGCATCGGCTAACTCCGTGCCAGCAGCCG<br>CGGTAATACGGGGGATGCAAGCGTTATCCGGAATGATTGGGCGTAAAGGGTCCGCAGGTGGCATTGCAA<br>GTCTGCTGTTAAAGAGTTTGGCTCAACCTCATAAAAGCAGTGGAAACTGCAAGCTAGAGTGTGGTCCGG<br>GCAGAGGGAATTCCTGGTGTAGCGGTGAAATGCGTAGAGATCAGGAAGAACACCGGTGGCGAAGGCGCT<br>CTGCTAGGCCATAACTGACACTGAGGGACGAAAGCTAGGGGAGCGAATGGGATTAGATACCCAGTAGT<br>CCTAGCCGTAAACGATGGATACTAGGCGTGGCTCGTATCGACCCGAGCTGTGCCGTAGCTAACGCGTTAA<br>GTATCCCGCTGGGGAGTACGCACGCAACTGTGAAACTCAAAGGAATTGACGGGGGCCCCGCACAAGCGG<br>TGGAGTATGTGGTTTAATTCGATGCAACGCGAAGAACCTTACCAAGGCTTGACATCTC<br>TACGGAGGATGCAAGCGTTATCCGGAATGATTGGGCGTAAAGGGTCCGCAGGTGGCATTGTAAGTCTGCT<br>GTTAAAGAGTTTGGCTCAACCAAATAAAAGCAGTGGAAACTACAAAGCTAGAGTGTGGTCCGGGCAGAG<br>GGAATTCCTGGTGTAGCGGTGAAATGCGTAGATATCAGGAAGAACACCGGTGGCGAAGGCGCTCTGCTA<br>GGCCAAGACTGACACTGAGGGACGAAAGCTAGGGGAGCGAATGGGATTAGATACCCAGTAGTCCTAGC<br>CGTAAACGATGGATACTAGGCGTAGCTCGTATCGACCCGAGCTGTGCCGTAGCTAACGCGTTAAGTATCC<br>CGCCTGGGGAGTACGCAGGCAACTGTGAAACTCAAAGGAATTGACGGGGGCCCCGCACAAGCGGTGGAGT<br>ATGTGGTTTAATTCGATGCAACGCGA<br>CGGAGCAAGACCGCGTGGGGGAGGAAGGTTCTTGATTGTCAACCCCTTTTTTCAGGGAAGAACACAATG<br>ACGGTACCTGAGGAATAAGCATCGGCTAACTCCGTGCCAGCAGCCGCGGTAATACGGGGGATGCAAGCG                                                                                                                                                                                                                                                                                                                                                                                                                                                                                                                                                                                                                                                                                                                                                                                                                                                                                                                                                                                                                                                                                                                                                                                                                                                                                                                                                        |
| B04.27_359F | <i>Aphanizomenon</i> | GATGCAACGCGA<br>CTTTTCTCAGGGAAGAACACAATGACGGTACCTGAGGAATAAGCATCGGCTAACTCCGTGCCAGCAGCCG<br>CGGTAATACGGGGGATGCAAGCGTTATCCGGAATGATTGGGCGTAAAGGGTCCGCAGGTGGCATTGCAA<br>GTCTGCTGTTAAAGAGTTTGGCTCAACCTCATAAAAGCAGTGGAAACTGCAAGCTAGAGTGTGGTCCGG<br>GCAGAGGGAATTCCTGGTGTAGCGGTGAAATGCGTAGAGATCAGGAAGAACACCGGTGGCGAAGGCGCT<br>CTGCTAGGCCATAACTGACACTGAGGGACGAAAGCTAGGGGAGCGAATGGGATTAGATACCCAGTAGT<br>CCTAGCCGTAAACGATGGATACTAGGCGTGGCTCGTATCGACCCGAGCTGTGCCGTAGCTAACGCGTTAA<br>GTATCCCGCTGGGGAGTACGCACGCAACTGTGAAACTCAAAGGAATTGACGGGGGCCCCGCACAAGCGG<br>TGGAGTATGTGGTTTAATTCGATGCAACGCGAAGAACCTTACCAAGGCTTGACATCTC<br>TACGGAGGATGCAAGCGTTATCCGGAATGATTGGGCGTAAAGGGTCCGCAGGTGGCATTGTAAGTCTGCT<br>GTTAAAGAGTTTGGCTCAACCAAATAAAAGCAGTGGAAACTACAAAGCTAGAGTGTGGTCCGGGCAGAG<br>GGAATTCCTGGTGTAGCGGTGAAATGCGTAGATATCAGGAAGAACACCGGTGGCGAAGGCGCTCTGCTA<br>GGCCAAGACTGACACTGAGGGACGAAAGCTAGGGGAGCGAATGGGATTAGATACCCAGTAGTCCTAGC<br>CGTAAACGATGGATACTAGGCGTAGCTCGTATCGACCCGAGCTGTGCCGTAGCTAACGCGTTAAGTATCC<br>CGCCTGGGGAGTACGCAGGCAACTGTGAAACTCAAAGGAATTGACGGGGGCCCCGCACAAGCGGTGGAGT<br>ATGTGGTTTAATTCGATGCAACGCGA<br>CGGAGCAAGACCGCGTGGGGGAGGAAGGTTCTTGATTGTCAACCCCTTTTTTCAGGGAAGAACACAATG<br>ACGGTACCTGAGGAATAAGCATCGGCTAACTCCGTGCCAGCAGCCGCGGTAATACGGGGGATGCAAGCG                                                                                                                                                                                                                                                                                                                                                                                                                                                                                                                                                                                                                                                                                                                                                                                                                                                                                                                                                                                                                                                                                                                                                                                                                                                                                                                                                        |
| B04.29_359F | <i>Aphanizomenon</i> | GATGCAACGCGA<br>CTTTTCTCAGGGAAGAACACAATGACGGTACCTGAGGAATAAGCATCGGCTAACTCCGTGCCAGCAGCCG<br>CGGTAATACGGGGGATGCAAGCGTTATCCGGAATGATTGGGCGTAAAGGGTCCGCAGGTGGCATTGCAA<br>GTCTGCTGTTAAAGAGTTTGGCTCAACCTCATAAAAGCAGTGGAAACTGCAAGCTAGAGTGTGGTCCGG<br>GCAGAGGGAATTCCTGGTGTAGCGGTGAAATGCGTAGAGATCAGGAAGAACACCGGTGGCGAAGGCGCT<br>CTGCTAGGCCATAACTGACACTGAGGGACGAAAGCTAGGGGAGCGAATGGGATTAGATACCCAGTAGT<br>CCTAGCCGTAAACGATGGATACTAGGCGTGGCTCGTATCGACCCGAGCTGTGCCGTAGCTAACGCGTTAA<br>GTATCCCGCTGGGGAGTACGCACGCAACTGTGAAACTCAAAGGAATTGACGGGGGCCCCGCACAAGCGG<br>TGGAGTATGTGGTTTAATTCGATGCAACGCGAAGAACCTTACCAAGGCTTGACATCTC<br>TACGGAGGATGCAAGCGTTATCCGGAATGATTGGGCGTAAAGGGTCCGCAGGTGGCATTGTAAGTCTGCT<br>GTTAAAGAGTTTGGCTCAACCAAATAAAAGCAGTGGAAACTACAAAGCTAGAGTGTGGTCCGGGCAGAG<br>GGAATTCCTGGTGTAGCGGTGAAATGCGTAGATATCAGGAAGAACACCGGTGGCGAAGGCGCTCTGCTA<br>GGCCAAGACTGACACTGAGGGACGAAAGCTAGGGGAGCGAATGGGATTAGATACCCAGTAGTCCTAGC<br>CGTAAACGATGGATACTAGGCGTAGCTCGTATCGACCCGAGCTGTGCCGTAGCTAACGCGTTAAGTATCC<br>CGCCTGGGGAGTACGCAGGCAACTGTGAAACTCAAAGGAATTGACGGGGGCCCCGCACAAGCGGTGGAGT<br>ATGTGGTTTAATTCGATGCAACGCGA<br>CGGAGCAAGACCGCGTGGGGGAGGAAGGTTCTTGATTGTCAACCCCTTTTTTCAGGGAAGAACACAATG<br>ACGGTACCTGAGGAATAAGCATCGGCTAACTCCGTGCCAGCAGCCGCGGTAATACGGGGGATGCAAGCG                                                                                                                                                                                                                                                                                                                                                                                                                                                                                                                                                                                                                                                                                                                                                                                                                                                                                                                                                                                                                                                                                                                                                                                                                                                                                                                                                        |
| B04.29_781R | <i>Planktothrix</i>  | GATGCAACGCGA<br>CTTTTCTCAGGGAAGAACACAATGACGGTACCTGAGGAATAAGCATCGGCTAACTCCGTGCCAGCAGCCG<br>CGGTAATACGGGGGATGCAAGCGTTATCCGGAATGATTGGGCGTAAAGGGTCCGCAGGTGGCATTGCAA<br>GTCTGCTGTTAAAGAGTTTGGCTCAACCTCATAAAAGCAGTGGAAACTGCAAGCTAGAGTGTGGTCCGG<br>GCAGAGGGAATTCCTGGTGTAGCGGTGAAATGCGTAGAGATCAGGAAGAACACCGGTGGCGAAGGCGCT<br>CTGCTAGGCCATAACTGACACTGAGGGACGAAAGCTAGGGGAGCGAATGGGATTAGATACCCAGTAGT<br>CCTAGCCGTAAACGATGGATACTAGGCGTGGCTCGTATCGACCCGAGCTGTGCCGTAGCTAACGCGTTAA<br>GTATCCCGCTGGGGAGTACGCACGCAACTGTGAAACTCAAAGGAATTGACGGGGGCCCCGCACAAGCGG<br>TGGAGTATGTGGTTTAATTCGATGCAACGCGAAGAACCTTACCAAGGCTTGACATCTC<br>TACGGAGGATGCAAGCGTTATCCGGAATGATTGGGCGTAAAGGGTCCGCAGGTGGCATTGTAAGTCTGCT<br>GTTAAAGAGTTTGGCTCAACCAAATAAAAGCAGTGGAAACTACAAAGCTAGAGTGTGGTCCGGGCAGAG<br>GGAATTCCTGGTGTAGCGGTGAAATGCGTAGATATCAGGAAGAACACCGGTGGCGAAGGCGCTCTGCTA<br>GGCCAAGACTGACACTGAGGGACGAAAGCTAGGGGAGCGAATGGGATTAGATACCCAGTAGTCCTAGC<br>CGTAAACGATGGATACTAGGCGTAGCTCGTATCGACCCGAGCTGTGCCGTAGCTAACGCGTTAAGTATCC<br>CGCCTGGGGAGTACGCAGGCAACTGTGAAACTCAAAGGAATTGACGGGGGCCCCGCACAAGCGGTGGAGT<br>ATGTGGTTTAATTCGATGCAACGCGA<br>CGGAGCAAGACCGCGTGGGGGAGGAAGGTTCTTGATTGTCAACCCCTTTTTTCAGGGAAGAACACAATG<br>ACGGTACCTGAGGAATAAGCATCGGCTAACTCCGTGCCAGCAGCCGCGGTAATACGGGGGATGCAAGCG                                                                                                                                                                                                                                                                                                                                                                                                                                                                                                                                                                                                                                                                                                                                                                                                                                                                                                                                                                                                                                                                                                                                                                                                                                                                                                                                                        |



|             |                                          |                                                                                                                                                                                                                                                                                                                                                                                                                                                                                                                                                                                                                                                                                                                                                                                                                                                                                                                                                                                                                                                                                                                                                                                                                                                                                                                                                                                                                                                                                                                                                                                                                                                                                                                                                                                                                                                                                                                                                                                                                                                                                                                                                                                                                                                                                                                                                                                |
|-------------|------------------------------------------|--------------------------------------------------------------------------------------------------------------------------------------------------------------------------------------------------------------------------------------------------------------------------------------------------------------------------------------------------------------------------------------------------------------------------------------------------------------------------------------------------------------------------------------------------------------------------------------------------------------------------------------------------------------------------------------------------------------------------------------------------------------------------------------------------------------------------------------------------------------------------------------------------------------------------------------------------------------------------------------------------------------------------------------------------------------------------------------------------------------------------------------------------------------------------------------------------------------------------------------------------------------------------------------------------------------------------------------------------------------------------------------------------------------------------------------------------------------------------------------------------------------------------------------------------------------------------------------------------------------------------------------------------------------------------------------------------------------------------------------------------------------------------------------------------------------------------------------------------------------------------------------------------------------------------------------------------------------------------------------------------------------------------------------------------------------------------------------------------------------------------------------------------------------------------------------------------------------------------------------------------------------------------------------------------------------------------------------------------------------------------------|
| B04.31_359F | <i>Aphanizomenon/Doli<br/>chospermum</i> | TTATCCGGAATGATTGGGCGTAAAGAGTCCGTAGGTGGTCATCCAAGTCTGCTGTAAAGAGCGAGGCTT<br>AACCTCGTAAAGGCAGTGGAACTGGAAGACTAGAGTGTAGTAGGGGCAGAGGGAATTCCCGGTGTAGC<br>GGTGAAATGCGTAGATATCAGGAAGAACACCGGTGGCGA<br>GTTGTAAACCTCTTTTCTCAGGAAGAACATCTTGCGGGTCTTGAGGATTAACCATCGGTTATTTCCGGGC<br>CACCACCCGGGAATTCCGGAGGGTGCAGCGTTTTTCGGGATTGTTGGGGGGTAAGGGGCCCGCAGGGG<br>GCTTTGTAGTTCGGCTGTAAACATGTTGCTTCACTCCATTTTCAGCGATGGAACTACAAGGCTAGAGTGT<br>GGTCGGGGCAGAGGGAATTCCTGGTGTAGCGGTGAAATGCGTAGATATCAGGAAGAACACCGGTGGCGA<br>AGGCGCTCTGCTGGGCCATAACTGACACTGATGGACGAAAGCTAGGGGAGCGAATGGGATTAGATACCC<br>CTGTAGTCCTGGCCGTAAACGATGAATACTAGGCGTAGCTCGAATCGACCCCCTCTGTGTCTAGCTAACG<br>CGTTAAGTGTTCCGCCTGGGGAGTACGCACGCAACTGTGAAACTCAAAGGAATTGACGGGGGCCCGCAC<br>AAGCGGTGGAGTATGTGGTTTAATTCGATGCAACGCGA<br>CTTGGGTTGTAACCTCTTTTCTCAGGGAAGAACAAATTGACGGTACCTGAGGAATAACCATCGGCTAATTC<br>CGGGCCACCAGCCGCGTAATACGGAGGATGCAAGCGTTATCCGGAATGATTGGGCGTAAAGGGTCCGC<br>AGGGGGCATTGTAATTCTGCTGTAAAGAGTTTGGCTCAACCAAATAAAAGCAATGGAACTACAAAGCT<br>AGAGTGTGGTCGGGGCAGAGGGAATTCCTGGTGTAGCGGTGAAATGCGTAGATATCAGGAAGAACACCG<br>GTGGCGAAGGCGCTCTGCTAGGCCAAGACTGACACTGAGGGACGAAAGCTAGGGGAGCGAATGGGATTA<br>GATACCCAGTAGTCCTAGCCGTAAACGATGGATACTAGGCGTAGCTCGAATCGACCCGAGCTGTGCCGT<br>AGCTAACGCGTTAAGTATCCCGCCTGGGGAGTACGCACGCAACTGTGAAACTCAAAGGAATTGACGGGG<br>CCCCGCACAAGCGGTGGAGTATGTGGTTTAATTCGATGCAACGCGAAGAACCTTACCAAGGCTTGACATG<br>TCACGAATTCGTTGAA<br>CTCTTGGGTTGTAACCTCTTTTCTCAGGGAAGAACAGAATGACGGTACCTGAGGAATAAGCATCGGCTAA<br>CTCCGTGCCAGCAGCCGCGTAATACGGAGGATGCAAGCGTTATCCGGAATGATTGGGCGTAAAGGGTCC<br>GCAGGTGGCATTGTAAGTCTGCTGTAAAGAGTTTGGCTCAACCAAATAAGAGCAGTGGAACTACAAAG<br>CTAGAGTGTGGTCGGGGCAGAGGGAATTCCTGGTGTAGCGGTGAAATGCGTAGATATCAGGAAGAACAC<br>CAGTGGCGAAGGCGCTCTGCTAGGCCGAGACTGACACTGAGGGACGAAAGCTAGGGGAGCGAATGGGA<br>TTAGATACCCAGTAGTCCTAGCCGTAAACGATGGATACTAGGCGTAGCTCGTATCGACCCGAGCTGTGC<br>CGGAGCTAACGCGTTAAGTATCCCGCCTGGGGAGTACGCAGGCAACTGTGAAACTCAAAGGAATTGACG<br>GGGGCCCGCACAAGCGGTGGAGTATGTGGTTTAATTCGATGCAACGCGAAGAACCTTACCAAGGCTTGAC<br>ATGTCACGAATCCTATTGAAAGATGGGAGTGCCTTCGGGAGCGTGAACACAGGTGGTGCATGGCTGTCGT<br>CAGCTCGTGTCTGAGATGTTGG<br>TCTTCCTATCTCTACGCATTTACCGCTACACTGGGAATTCCTCTACCTCTACTGCACTCTAGTCTGCTAGT<br>TTCCACCGCCTTTATGACGTTAAGCCCCGAGATTTAACAGCAGACTTGGTAGGCCACCTACAGACGCTTTA<br>CGCCCAGTGATTCCGGATAACGCTTGATCCTCCGTATTACCGCGGTGCTGGCACGGAGTTAGCCGATGC<br>TTATTCCTCAAGTACCGTCAGTACTTCTTCC |
|             |                                          | CTTGAGGTAATTGAGGAACAGCCTCGGCTCACTCGTGCCAGCAGCCGCGTAATACGGGGGAGGCAAGC<br>GTTTTCCGGAATTATTGGGCGTAAAGCGTCCGCAGGTGGTCTTCCAAGTCTGCCGTCAAATCACGTTGCTT                                                                                                                                                                                                                                                                                                                                                                                                                                                                                                                                                                                                                                                                                                                                                                                                                                                                                                                                                                                                                                                                                                                                                                                                                                                                                                                                                                                                                                                                                                                                                                                                                                                                                                                                                                                                                                                                                                                                                                                                                                                                                                                                                                                                                                |
| B04.34_359F | <i>Aphanizomenon</i>                     | CTTGGGTTGTAACCTCTTTTCTCAGGGAAGAACAAATTGACGGTACCTGAGGAATAACCATCGGCTAATTC<br>CGGGCCACCAGCCGCGTAATACGGAGGATGCAAGCGTTATCCGGAATGATTGGGCGTAAAGGGTCCGC<br>AGGGGGCATTGTAATTCTGCTGTAAAGAGTTTGGCTCAACCAAATAAAAGCAATGGAACTACAAAGCT<br>AGAGTGTGGTCGGGGCAGAGGGAATTCCTGGTGTAGCGGTGAAATGCGTAGATATCAGGAAGAACACCG<br>GTGGCGAAGGCGCTCTGCTAGGCCAAGACTGACACTGAGGGACGAAAGCTAGGGGAGCGAATGGGATTA<br>GATACCCAGTAGTCCTAGCCGTAAACGATGGATACTAGGCGTAGCTCGAATCGACCCGAGCTGTGCCGT<br>AGCTAACGCGTTAAGTATCCCGCCTGGGGAGTACGCACGCAACTGTGAAACTCAAAGGAATTGACGGGG<br>CCCCGCACAAGCGGTGGAGTATGTGGTTTAATTCGATGCAACGCGAAGAACCTTACCAAGGCTTGACATG<br>TCACGAATTCGTTGAA<br>CTCTTGGGTTGTAACCTCTTTTCTCAGGGAAGAACAGAATGACGGTACCTGAGGAATAAGCATCGGCTAA<br>CTCCGTGCCAGCAGCCGCGTAATACGGAGGATGCAAGCGTTATCCGGAATGATTGGGCGTAAAGGGTCC<br>GCAGGTGGCATTGTAAGTCTGCTGTAAAGAGTTTGGCTCAACCAAATAAGAGCAGTGGAACTACAAAG<br>CTAGAGTGTGGTCGGGGCAGAGGGAATTCCTGGTGTAGCGGTGAAATGCGTAGATATCAGGAAGAACAC<br>CAGTGGCGAAGGCGCTCTGCTAGGCCGAGACTGACACTGAGGGACGAAAGCTAGGGGAGCGAATGGGA<br>TTAGATACCCAGTAGTCCTAGCCGTAAACGATGGATACTAGGCGTAGCTCGTATCGACCCGAGCTGTGC<br>CGGAGCTAACGCGTTAAGTATCCCGCCTGGGGAGTACGCAGGCAACTGTGAAACTCAAAGGAATTGACG<br>GGGGCCCGCACAAGCGGTGGAGTATGTGGTTTAATTCGATGCAACGCGAAGAACCTTACCAAGGCTTGAC<br>ATGTCACGAATCCTATTGAAAGATGGGAGTGCCTTCGGGAGCGTGAACACAGGTGGTGCATGGCTGTCGT<br>CAGCTCGTGTCTGAGATGTTGG<br>TCTTCCTATCTCTACGCATTTACCGCTACACTGGGAATTCCTCTACCTCTACTGCACTCTAGTCTGCTAGT<br>TTCCACCGCCTTTATGACGTTAAGCCCCGAGATTTAACAGCAGACTTGGTAGGCCACCTACAGACGCTTTA<br>CGCCCAGTGATTCCGGATAACGCTTGATCCTCCGTATTACCGCGGTGCTGGCACGGAGTTAGCCGATGC<br>TTATTCCTCAAGTACCGTCAGTACTTCTTCC                                                                                                                                                                                                                                                                                                                                                                                                                                                                                                                                                                                                                                                                                                                                                                        |
| E04.29_359F | <i>Aphanizomenon</i>                     | CTTGAGGTAATTGAGGAACAGCCTCGGCTCACTCGTGCCAGCAGCCGCGTAATACGGGGGAGGCAAGC<br>GTTTTCCGGAATTATTGGGCGTAAAGCGTCCGCAGGTGGTCTTCCAAGTCTGCCGTCAAATCACGTTGCTT                                                                                                                                                                                                                                                                                                                                                                                                                                                                                                                                                                                                                                                                                                                                                                                                                                                                                                                                                                                                                                                                                                                                                                                                                                                                                                                                                                                                                                                                                                                                                                                                                                                                                                                                                                                                                                                                                                                                                                                                                                                                                                                                                                                                                                |
| E04.32_781R | rhodoplast                               | CTTGAGGTAATTGAGGAACAGCCTCGGCTCACTCGTGCCAGCAGCCGCGTAATACGGGGGAGGCAAGC<br>GTTTTCCGGAATTATTGGGCGTAAAGCGTCCGCAGGTGGTCTTCCAAGTCTGCCGTCAAATCACGTTGCTT                                                                                                                                                                                                                                                                                                                                                                                                                                                                                                                                                                                                                                                                                                                                                                                                                                                                                                                                                                                                                                                                                                                                                                                                                                                                                                                                                                                                                                                                                                                                                                                                                                                                                                                                                                                                                                                                                                                                                                                                                                                                                                                                                                                                                                |
| E04.34_359F | <i>Microcystis</i>                       | CTTGAGGTAATTGAGGAACAGCCTCGGCTCACTCGTGCCAGCAGCCGCGTAATACGGGGGAGGCAAGC<br>GTTTTCCGGAATTATTGGGCGTAAAGCGTCCGCAGGTGGTCTTCCAAGTCTGCCGTCAAATCACGTTGCTT                                                                                                                                                                                                                                                                                                                                                                                                                                                                                                                                                                                                                                                                                                                                                                                                                                                                                                                                                                                                                                                                                                                                                                                                                                                                                                                                                                                                                                                                                                                                                                                                                                                                                                                                                                                                                                                                                                                                                                                                                                                                                                                                                                                                                                |



|             |                      |                                                                                                                                                                                                                                                                                                                                                                                                                                                                                                                                                                                                                                                                                                                                                                                                                                                                                                                                                                             |
|-------------|----------------------|-----------------------------------------------------------------------------------------------------------------------------------------------------------------------------------------------------------------------------------------------------------------------------------------------------------------------------------------------------------------------------------------------------------------------------------------------------------------------------------------------------------------------------------------------------------------------------------------------------------------------------------------------------------------------------------------------------------------------------------------------------------------------------------------------------------------------------------------------------------------------------------------------------------------------------------------------------------------------------|
| E04.36_359F | <i>Microcystis</i>   | AACCACCTAAAGGCGGTGGAAACTGGCAGACTAGAGAGCAGTAGGGGTAGCAGGAATTCCCAGTGTAGC<br>GGTGAAATGCGTAGAGATTGGGAAGAACATCGGTGGCGAAAGCGTGCTACTGGGCTGTATCTGACACTC<br>AGGGACGAAAGCTAGGGGAGCGAAAGGGATA<br>GTACTGAGGAAAAGCCTGGCTAACTCTGTGCCGCAGCCGCGGTAAACGGGGGAGGCAAGCGTTTTTCCGG<br>ATTATTGGGCGTAAAGCGTCCGCAGGTGGTCTGCCAAGTCTGCCGTCAAATATCGTTGCTTAACCACCTAA<br>AGGCGGTGGAAATGGCAGACTAGAGTGCAGTAGGGGTAGCAGGAATTCCCAGTGTAGCGGTGAAATGCG<br>TAATATTGGGAAGAACATCGGTGGCGAAAGCGTGCTACTGGGCTGTATCTGACACTCAGGGACGAAAGCT<br>AGGGGAGCG                                                                                                                                                                                                                                                                                                                                                                                                                                                                      |
|             |                      | GCCTCTGGGCTGTAAACCTCTTTTCTCAAGGAAGAAGATCTGACGGTACTTGAGGAATAAGCCACGGCTA<br>ATTCCGTGCCCAGCAGCCGCGGTAATACGGGAGTGGCAAGCGTTATCCGGAATTATTGGGCGTAAAGCGTC<br>CGCAGGCGGCCTTGTAAGTCTGCCGTTAAAGCGTGGAGCTTAACTCCATTTCGGCGATGGAACTACAAG<br>GCTTGAGTGTGGTAGGGGCAGAGGGAATTCCCGGTGTAGCGGTGAAATGCGTAGATATCGGGAAGAACA<br>CCAGTGGCGAAGGCGCTCTGCTGGGCCATAACTGACGCTCATGGACGAAAGCCAGGGGAGCGAAAGGG<br>ATTAGATACCCCTGTAGTCTTGGCCGTAAACGATGAACACTAGGTGTGCGGGGAATCGACCCCCTCGGTG<br>TCGTAGCCAACGCGTTAAGTGTTCGCCTGGGGAGTACGCACGCAAGTGTGAAACTCAAAGGAATTGACG<br>GG                                                                                                                                                                                                                                                                                                                                                                                                                                        |
| H02.31_359F | <i>Planktothrix</i>  | TGCGTTGGAAGGGTGGGCTGGAGGGAGAGCCTCTTGGGACTGTCAACCTCTTTTCTCAGGGAAGAACACC<br>ATGACGGTCCCTGAGGATAAAGCATCGGCTAACTCCGTGCCCAGCACCCGCGGTAATACGGGGGATGCAA<br>GCGTTATCCGGAATGATTGGGCGTAAAGAGTCCGTAGGTGGTCATCCAAGTCTGCTGTTAAAGATGAAGC<br>TTAACCTCTTTTCGGCAGTGGAACTGGAAGATAGAGTGTAGTAGGGGCAGAGGGAATTCTTGGTGTAGCG<br>GTGAAATGCGTAGAGTCAGGAAGAACACCGGTGGCGAAGGCGCTCTGCTGGGCTATAACTGACACTGAG<br>GGCGAAAGCTAGGGGAGCGAATGGGATTAGATACCCC                                                                                                                                                                                                                                                                                                                                                                                                                                                                                                                                                      |
|             |                      | AACCTCTTTTCTCAGGGAAGAAAAACACGACGGTACCTTGAGGAATAAGCATCGGCTAACTCCGTGCCAG<br>CAGCCGCGGTAATACGGAGGATGCAAGCGTTATCCGGAATGATTGGGCGTAAAGGGTCCGCAGGTGGTA<br>GTGTAAGTCTGCTGTTAAAGAATCACGCTCAACGTGATCAAAGCAGTGGAAACTACACAAGTACGAGTACG<br>GTAGGGGCAGAAGGAATTCCTGGTGTAGCGGTGAAATGCGTAGATATCAGGAAGAACACCGGTGGCGAA<br>AGCGTTCTGCTAGACCTGTACTGACACTGAGGGACGAAAGCTAGGGGAGCGAATGGGATTAGATACCCC<br>AGTAGTCCTAGCCGTAAACGATGGATACTAGGTGTGGCTTGATCGACCCGAGCCGTACCGTAGCTAACG<br>CGTTAAGTATCCCGCCTGGGGAGTACGCACGCAAGTGTGAAACTCAAAGGATTGACGGG<br>CCGTGCCAGCAGCCGCGGTAATACGGGGGATGCAAGCGTTATCCGGAATGATTGGGCGTAAAGAGTCCG<br>TAGGTAGTCATCCAAGTCTGCTGTTAAAGAGCGAGGCTTAACCTCGTAAAGGCAGTGGAACTGGAAGAC<br>TAGAGTGTAGTAGGGGCAGAGGGAATTCCTGGTGTAGCGGTGAAATGCGTAGAGATCAGGAAGAACACC<br>GGTGGCGAAGGCGCTCTGCTGGGCTATAACTGACACTGAGGGACGAAAGCTAGGGGAGCGAATGGGATT<br>AGATACCCCAGTAGTCCTAGCGGTAAACGATGGAAGTAAAGTGTGGCCTGTATCGACCCGGGCCGTGCCG<br>AAGCAAACGCGTTAAGTTTCCCGCCTGGGGAGTACGCACGCAAGTGTGAAACTCAAAGGAATTGACGGG |
| H02.32_359F | <i>Aphanizomenon</i> |                                                                                                                                                                                                                                                                                                                                                                                                                                                                                                                                                                                                                                                                                                                                                                                                                                                                                                                                                                             |
| H02.35_359F | <i>Planktothrix</i>  |                                                                                                                                                                                                                                                                                                                                                                                                                                                                                                                                                                                                                                                                                                                                                                                                                                                                                                                                                                             |



|             |                      |                                                                                                                                                                                                                                                                                                                                                                                                                                                                                                                                                                                                      |
|-------------|----------------------|------------------------------------------------------------------------------------------------------------------------------------------------------------------------------------------------------------------------------------------------------------------------------------------------------------------------------------------------------------------------------------------------------------------------------------------------------------------------------------------------------------------------------------------------------------------------------------------------------|
| H02.36_359F | <i>Synechococcus</i> | GGCCCGCACAAAGCGGTGGAGTATGTGGTTTAATTCGATGCAACGCGAAGAACCTTACCAGGACTTGACAT<br>CTCTGGAATCTC                                                                                                                                                                                                                                                                                                                                                                                                                                                                                                              |
|             |                      | CTCTGGGCTGTAACCTCTTTTCTCAAGGAAGAAGATCTGACGGTACTTGATGAATAAGCCACGGCTAATTC<br>CGTGCCAGCAGCCGCGGTAATACGGGAGTGGCAAGCGTTATCCGGAATTATTGGGCGTAAAGCGTCCGCA<br>GGCGGCCTTGTAAGTCTGTCGTTAAAGCGTGGAGCTTAACTCCATTTACGCGATGGAAACTGCAAGGCTTG<br>AGTGTGGTAGGGGCAGAGGGAATTCCCGGTGTAGCGGTGAAATGCGTAGATATCGGGAAGAACACCAGT<br>GGCGAAGGCGCTCTGCTGGGCCATAACTGACGCTCATGGACGAAAGCCAGGGGAGCGAAAGGGATTAGA<br>TACCCCTGTAGTCCTGGCCGTAAACGATGAACACTAGGTGTCGGGGGAATCGACCCCCTCGGTGTCGTAG<br>CCAACGCGTTAAGTGTTCCGCCTGGGGAGTACGCACGCAAGTGTGAAACTCAAAGGAATTGACGGGGGC<br>CCGCACAAGCGGTGGAGTATGTGGTTTAATTCGATGCAACGCGAAGAACCTTAC          |
| I01.28_781R | <i>Cyanobium</i>     | ACCGCTACACCGGGAATTTCTCTGCCCTACCACACTCTAGTTCTACAGTTTCCATCGCTGAAATGGAGTT<br>AAGCTCCACGTTTTAACGACAGACTTGTAACCGCCTGCGGACGCTTTACGCCAATAATTCCGGATAA<br>CGCTTGCCACTCCCGTATTACCGCGGTGCTGGCACGGAATTAGCCGAGGCTTATTCATCAAGTACCGTCA<br>GATCTTCTTCCTTGATAAAAGAGGTTTACAGCCACAGGCCTTCATCCCTCACGCGGCGTTGCTCCGTCAG<br>GCTTTC                                                                                                                                                                                                                                                                                          |
|             |                      | AGGCCTCTGGGCTGTAAACCTCTTTTCTCAAGGAAGAAGATCTGACGGTACTTGAGGAATAAGCCACGGC<br>TAATTCGTGCCAGCAGCCGCGGTAATACGGGAGTGGCAAGCGTTATCCGGAATTATTGGGCGTAAAGCG<br>TCCGCAGGCGGCCTTGTAAGTCTGTCGTTAAAGCGTGGAGCTTAACTCCATTTACGCGATGGAAACTACA<br>AGGCTTGAGTGTGGTAGGGGCAGAGGGAATTCCCGGTGTAGCGGTGAAATGCGTAGATATCGGGAAGAA<br>CACCAGTGGCGAAGGCGCTCTGCTGGGCCATAACTGACGCTCATGGACGAAAGCCAGGGGAGCGAAAGG<br>GATTAGATACCCCTGTAGTCCTGGCCGTAAACGATGAACACTAGGCGTCGGGGGAATCGACCCCCTCGGT<br>GTCGTAGCCAACGCGTTAAGTGTTCCGCCTGGGGAGTACGCACGCAAGTGTGAAACTCAAAGGAATTGAC<br>GGGGCCCCGCACAAGCGGTGGAGTATGTGGTTTAATTCGATGCAACGCGAAGA             |
| I01.35_359F | <i>Synechococcus</i> | ATGGGCGAAAGCCTGACGGAGCAACGCCGCGTGAGGGATGAAGGCCTGTGGGCTGTAAACCTCTTTTCTC<br>AAGGAAGAAGATCTGACGGTACTTGAGGAATAAGCCACGGCTAATTCCGTGCCAGCAGCCGCGGTAATA<br>CGGGAGAGGCAAGCGTTATCCGGAATCATTGGGCGTAAAGCGTCCGCAGGCGGCCTTGCAAGTCTGTCGT<br>TAAAGCGTGGAGCTTAACTCCATAAAAGCGGTGGAAACTACAAGGCTAGAGTGTGGTAGGGGCAGAGGG<br>AATTCCCGGTGTAGCGGT                                                                                                                                                                                                                                                                             |
|             |                      | GCTCTTGGGTTGTAAACCTCTTTTCTCAGGGAAGAACAAAATGACGGTACCTGAGGAATAAGCATCGGCT<br>AATTCGTGCCAGCAGCCGCGGTAATACGGAGGATGCAAGCGTTATCCGGAATGATTGGGCGTAAAGGG<br>TCCGCAGGTGGCATTGTAAGTCTGCTGTTAAAGAGTTTGGCTCAACCAAATAAGAGCAGTGGAAACTACA<br>AAGCTAGAGTGTGGTCGGGGCAGAGGGAATTCCTGGTGTAGCGGTGAAATGCGTAGATATCAGGAAGAA<br>CACCGGTGGCGAAGGCGCTCTGCTAGGCCAAAACCTGACACTGAGGGACGAAAGCTAGGGGAGCGAATG<br>GGATTAGATACCCAGTAGTCCTAGCCGTAAACGATGGATACTAGGCGTAGCTCGTATCGACCCGAGCTG<br>TGCCGTAGCTAACGCGTTAAGTATCCCGCCTGGGGAGTACGCAGGCAACTGTGAAACTCAAAGGAATTGA<br>CGGGGGCCCCGCACAAGCGGTGGAGTATGTGGTTTAATTCGATGCAACGCGAAGAACCTTACCAAGG |
| I01.37_781R | <i>Cyanobium</i>     |                                                                                                                                                                                                                                                                                                                                                                                                                                                                                                                                                                                                      |
|             |                      |                                                                                                                                                                                                                                                                                                                                                                                                                                                                                                                                                                                                      |
| I04.27_359F | <i>Aphanizomenon</i> |                                                                                                                                                                                                                                                                                                                                                                                                                                                                                                                                                                                                      |
|             |                      |                                                                                                                                                                                                                                                                                                                                                                                                                                                                                                                                                                                                      |



|             |                       |                                                                                                                                                                                                                                                                                                                                                                                                                                                                                                                                                                                                                                                                                                                                                                                                                                                                                                                                                                                                                                                                                                                                                                                                                                                                                                                                                                                                                                                                                                                                                                                                                                                                                                                                                                                                                                                                                                                                                                                                                                                                                                                                                                                                                                                                                                                                                                                                                                                                                                                                                                                                                                                              |
|-------------|-----------------------|--------------------------------------------------------------------------------------------------------------------------------------------------------------------------------------------------------------------------------------------------------------------------------------------------------------------------------------------------------------------------------------------------------------------------------------------------------------------------------------------------------------------------------------------------------------------------------------------------------------------------------------------------------------------------------------------------------------------------------------------------------------------------------------------------------------------------------------------------------------------------------------------------------------------------------------------------------------------------------------------------------------------------------------------------------------------------------------------------------------------------------------------------------------------------------------------------------------------------------------------------------------------------------------------------------------------------------------------------------------------------------------------------------------------------------------------------------------------------------------------------------------------------------------------------------------------------------------------------------------------------------------------------------------------------------------------------------------------------------------------------------------------------------------------------------------------------------------------------------------------------------------------------------------------------------------------------------------------------------------------------------------------------------------------------------------------------------------------------------------------------------------------------------------------------------------------------------------------------------------------------------------------------------------------------------------------------------------------------------------------------------------------------------------------------------------------------------------------------------------------------------------------------------------------------------------------------------------------------------------------------------------------------------------|
| I04.28_359F | <i>Aphanizomenon</i>  | <p>GCTCTTGGGTTGTAACCTCTTTTCTCAGGGAAGAACAACATGACGGTACCTGAGGAATAAGCATCGGCTA<br/> ACTCCGTGCCAGCAGCCGCGGTAATACGGAGGGTGCAAGCGTTATCCGGAATGATTGGGCGTAAAGGGT<br/> CCGCAGGTGGCATTGTAAGTCTGCTGTTAAAGAGTTTGGCTCAACCAGATAAGAGCAGTGGAAGTACAA<br/> AGCTAGAGTGTGGTCGGGGCAGAGGGAATTCCTGGTGTAGCGGTGAAATGCGTAGATATCAGGAAGAAC<br/> ACCGGTGGCGAAGGCGCTCTGCTAGGCCAAGACTGACACTGAGGGACGAAAGCTAGGGGAGCGAATGG<br/> GATTAGATACCCCAGTAGTCCTAGCCGTAAACGATGGATACTAGGCGTAGCTCGTATCGACCCGAGCTGT<br/> GCCGTAGCTAACGCGTTAAGTATCCCGCCTGGGGAGTACGCAGGCAACTGTGAAACTCAAAGGAATTGA<br/> CGGGGGCCCCGCACAAGCGGTGGAGTATGTGGTTTAATTTCGATGCAACGCGAAGAACCTTACCAAGGCTTG<br/> ACATGTCACGAATTCTGTTGAAATATGGGAGTGCCTTCGGGAGCGTGAACACA<br/> CTTGGGTTGTAACCTCTTTTCTCAGGGAAGAACAAGAATGACGGTACCTGAGGAATAAGCATCGGCTAAC<br/> TCCGTGCCAGCAGCCGCGGTAATACGGAGGATGCAAGCGTTATCCGGAATGATTGGGCGTAAAGGGTCC<br/> GCAGGTGGCATAGTAAGTCTGCTGTTAAAGAGTACGCTCAACGTGATAAGAGCAGTGGAAGTACAAA<br/> GCTAGAGTATGGTCGGGGCAGAGGGAATTCCTGGTGTAGCGGTGAAATGCGTAGATATCAGGAAGAACA<br/> CCGGTGGCGAAGGCGCTCTGCTAGGCCAAAAGTACACTGAGGGACGAAAGCTAGGGGAGCGAATGGG<br/> ATTAGATACCCCAGTAGTCCTAGCCGTAAACGATGGATACTAGGCGTAGCTCGTATCGACCCGAGCTGTG<br/> CCGTAGCTAACGCGTTAAGTATCCCGCCTGGGGAGTACGCAGGCAACTGTGAAACTCAAAGGAATTGAC<br/> GGGGGGCCCCGCACAAGCGGTGGAGTATGTGGTTTAATTTCGATGCAACGCGAAGAACCTTACCAAGGCTTGA<br/> CATGTCACGAATCCTGTAGAAATATAGGAGTGCC<br/> GGCTCTTGGGTTGTAACCTCTTTTCTCAGGGAAGAACAAGAATGACGGTACCTGAGGAATAAGCATCGGCT<br/> AACTCCGTGCCAGCAGCCGCGGTAATACGGAGGATGCAAGCGTTATCCGGAATGATTGGGCGTAAAGGG<br/> TCCGCAGGTGGCATAGTAAGTCTGCTGTTAAAGAGTCTGGCTCAACGAGATAAGAGCAGTGGAAGTACA<br/> AAGCTAGAGTTTGGTCGGGGCAGAGGGAATTCCTGGTGTAGCGGTGAAATGCGTAGATATCAGGAAGAA<br/> CACCGGTGGCGAAGGCGCTCTGCTAGGCCAAAAGTACACTGAGGGACGAAAGCTAGGGGAGCGAATG<br/> GGATTAGATACCCCAGTAGTCCTAGCCGTAAACGATGGATACTAGGCGTAGCTCGTATCGACCCGAGCTG<br/> TGCCGTAGCTAACGCGTTAAGTATCCCGCCTGGGGAGTACGCAGGCAACTGTGAAACTCAAAGGAATTGA<br/> CGGGGGCCCCGCACAAGCGGTGGAGTATGTGGTTTAATTTCGATGCAACGCGAAGAACCTTACCAAGGCTTG<br/> ACATGTCACGAATCCTGTAGAAATATAGGAGTGCCT<br/> CTTGGGTTGTAACCTCTTTTCTCAGGGAAGAACAAGAATGACGGTACCTGAGGAATAAGCATCGGCTAAC<br/> TCCGTGCCAGCAGCCGCGGTAATACGGAGGATGCAAGCGTTATCCGGAATGATTGGGCGTAAAGGGTCC<br/> GCAGGTGGCATAGAAAGTCTGCTGTTAAAGAGTCTGGCTCAACCTGATAAGAGCAGTGGAAGTACAAA<br/> GCTAGAGTATGGTCGGGGCAGAGGGAATTCCTGGTGTAGCGGTGAAATGCGTAGATATCAGGAAGAACA<br/> CCGGTGGCGAAGGCGCTCTGCTAGGCCAAAAGTACACTGAGGGACGAAAGCTAGGGGAGCGAATGGG<br/> ATTAGATACCCCAGTAGTCCTAGCCGTAAACGATGGATACTAGGCGTAGCTCGTATCGACCCGAGCTGTG<br/> CCGTAGCTAACGCGTTAAGTATCCCGCCTGGGGAGTACGCAGGCAACTGTGAAACTCAAAGGAATTGAC<br/> GGGGGGCCCCGCACAAGCGGTGGAGTATGTGGTTTAATTTCGATGCAACGCGAAGAACCTTACCAAGGCTTGA</p> |
| I04.29_359F | <i>Dolichospermum</i> |                                                                                                                                                                                                                                                                                                                                                                                                                                                                                                                                                                                                                                                                                                                                                                                                                                                                                                                                                                                                                                                                                                                                                                                                                                                                                                                                                                                                                                                                                                                                                                                                                                                                                                                                                                                                                                                                                                                                                                                                                                                                                                                                                                                                                                                                                                                                                                                                                                                                                                                                                                                                                                                              |
| I04.30_359F | <i>Dolichospermum</i> |                                                                                                                                                                                                                                                                                                                                                                                                                                                                                                                                                                                                                                                                                                                                                                                                                                                                                                                                                                                                                                                                                                                                                                                                                                                                                                                                                                                                                                                                                                                                                                                                                                                                                                                                                                                                                                                                                                                                                                                                                                                                                                                                                                                                                                                                                                                                                                                                                                                                                                                                                                                                                                                              |
| I04.31_359F | <i>Dolichospermum</i> |                                                                                                                                                                                                                                                                                                                                                                                                                                                                                                                                                                                                                                                                                                                                                                                                                                                                                                                                                                                                                                                                                                                                                                                                                                                                                                                                                                                                                                                                                                                                                                                                                                                                                                                                                                                                                                                                                                                                                                                                                                                                                                                                                                                                                                                                                                                                                                                                                                                                                                                                                                                                                                                              |

---



|             |                       |                                                                                                                                                                                                                                                                                                                                                                                                                                                         |
|-------------|-----------------------|---------------------------------------------------------------------------------------------------------------------------------------------------------------------------------------------------------------------------------------------------------------------------------------------------------------------------------------------------------------------------------------------------------------------------------------------------------|
| I04.32_359F | <i>Microcystis</i>    | <p>CATGTCACGAATCCTGTAGAAATATAGGAGTGCCTTAGGGAGCGTGAACACAGGTGGTGCATGGCTGTCC<br/> TCAGCTCGTGTCTGTAGATGTTGGGTAAAGTCC</p> <p>ATCAGCCTCGGCTAACTCCGTGCCAGCAGCCGCGGTAATACGGGGGAGGCAAGCGTTATCCGGAATTATT<br/> GGGCGTAAAGCGTCCGCAGGTGGTCATCCAAGTCTGCCGTCAAATCAGGTTGCTTAACGACCTAAAGGCG<br/> GTGGAAACTGGCAGACTAGAGAGCAGTAGGGGTAGCAGGAATTCCCAGTGTAGCGGTGAAATGCGTAGA<br/> GATTGGGAAGAACATCGGTGGCGAAAGCGTGCTACTGGGCTGTATCTGACACTCAGGGACGAAAGCTAG<br/> GGGAGCGAAAGGG</p> |
| I04.32_359F | <i>Dolichospermum</i> | <p>CTGAGGAATAAGCATCGGCTAACTCCGGGCCACCAGCCGCGGTAATACGGAGGATGCAAGCGTTATCCG<br/> GAATGATTGGGCGTAAAGGGTCCGCAGGTGGCATTGAAAGTCTGCTGTAAAGAGTCTGGCTCAACCTGA<br/> TAAGAGCAGTGGAAGCTACAAAGCTAGAGTTTGGTCGGGGCAGAGGGAATTCCTGGTGTAGCGGTGAAA<br/> TGCGTAGATATCAGGAAGAACACCGGTGGCGAAGGCGCTCTGCTAGGCCAAACTGACACTGAGGGACGA<br/> AAGCTAGGGGAGCGAATGGGATTAGATACCCAGTAGTCCTAGCCGTAAACGATGGATACTAGGCGTAG<br/> CTCGTATCGACCCGAGCTGTGCCGGAGCTAACGCGTTAAGTATCCCGCCTGGG</p>      |
| I04.34_359F | <i>Microcystis</i>    | <p>GGAATTCAGCCTCGGCTAACTTCCGTGCCAGCAGCCGCGGTAATACGGGGGAGGCAAGCGTTTATCCGGA<br/> ATTATTGGGCGTAAAGCGTCCGCAGGTGGTCAGCCAAGTCTGCCGTCAAATCAGGTTGCTTAACCACCTA<br/> AAGGCGGTGGAAACTGGCAGACTAGAGAGCAGTAGGGGTAGCAGGAATTCCCAGTGTAGCGGTGAAATG<br/> CGTAGAGATTGGGAAGAACATCGGTGGCGAAAGCGTGCTACTGGGCTGTATCTGACACTCAGGGACGAA<br/> AGCTAGGGGAGCGAAAGGG</p>                                                                                                                |
| I04.36_359F | <i>Planktothrix</i>   | <p>AGTCTGCTGTAAAGAGGGAGGCTTAACCTCTTTCGGCAGTGGAAACTGGAAGATAGAGTGTGGTAGGGG<br/> CAGAGGGAATTCCTGGTGTAGCGGTGAAATGCGTAGAGTCAGGAAGAACACCGGTGGCGAAGGCGCTCT<br/> GCTGGGCTATAACTGACACTGAGGGACGAAAGCTAGGGGAGCGAATGGGTTAGATACCCAGTAGTCCT<br/> AGCGGAAACGATGGAAC</p>                                                                                                                                                                                                |
| I04.37_359F | <i>Cyanodictyon</i>   | <p>GGAGCTTAACTCCATTTAGCGGTGGAAACTACAAAGCTTGAGTGTGGTAGGGGCAGAGGGAATTCCCGG<br/> TG TAGCGGTGAAATGCGTAGATATCGGGAAGAACACCAGTGGCGAAGGCGCTCTGCTGGGCCATAACTG<br/> ACACTCATGGACGAAAGCCAGGGGAGCGAATGGGATTAGATACCCCTGTAGTCCTGGCCGTAAACGATG<br/> AACACTAGG</p>                                                                                                                                                                                                      |

---
